# Supplementary material for: Epidemiology and risk factors for diabetes in the suburbs of Beijing: a retrospective cohort study
Source: PubMed Central journal article supplement — BMJ Open. 2021 Mar 25;11(3):e041526. doi: 10.1136/bmjopen-2020-041526 (PMC7996367; doi:10.1136/bmjopen-2020-041526), 2021-03-25
Supplement: bmjopen-2020-041526.draft_revisions.pdf [file bmjopen-2020-041526.draft_revisions.pdf]

# BMJ Open

BMJ Open is committed to open peer review. As part of this commitment we make the peer review history of every article we publish publicly available.

When an article is published we post the peer reviewers' comments and the authors' responses online. We also post the versions of the paper that were used during peer review. These are the versions that the peer review comments apply to.

The versions of the paper that follow are the versions that were submitted during the peer review process. They are not the versions of record or the final published versions. They should not be cited or distributed as the published version of this manuscript.

BMJ Open is an open access journal and the full, final, typeset and author-corrected version of record of the manuscript is available on our site with no access controls, subscription charges or pay-per-view fees (<http://bmjopen.bmj.com>).

If you have any questions on BMJ Open's open peer review process please email [info.bmjopen@bmj.com](mailto:info.bmjopen@bmj.com)

# BMJ Open

## Diabetes in the suburbs of Beijing: epidemiology and risk factors: a retrospective cohort study

|                               |                                                                                                                                                                                           |
|-------------------------------|-------------------------------------------------------------------------------------------------------------------------------------------------------------------------------------------|
| Journal:                      | <i>BMJ Open</i>                                                                                                                                                                           |
| Manuscript ID                 | bmjopen-2020-041526                                                                                                                                                                       |
| Article Type:                 | Original research                                                                                                                                                                         |
| Date Submitted by the Author: | 10-Jun-2020                                                                                                                                                                               |
| Complete List of Authors:     | Xie, Lingding; China-Japan Friendship Hospital<br>Zhao, Xu; Civil Aviation General Hospital<br>Zhang, Bo; China-Japan Friendship Hospital,<br>Zhu, Haiqing; China Meitan General Hospital |
| Keywords:                     | General diabetes < DIABETES & ENDOCRINOLOGY, EPIDEMIOLOGY, PUBLIC HEALTH                                                                                                                  |
|                               |                                                                                                                                                                                           |

SCHOLARONE™  
Manuscripts

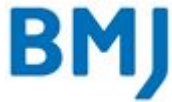

I, the Submitting Author has the right to grant and does grant on behalf of all authors of the Work (as defined in the below author licence), an exclusive licence and/or a non-exclusive licence for contributions from authors who are: i) UK Crown employees; ii) where BMJ has agreed a CC-BY licence shall apply, and/or iii) in accordance with the terms applicable for US Federal Government officers or employees acting as part of their official duties; on a worldwide, perpetual, irrevocable, royalty-free basis to BMJ Publishing Group Ltd ("BMJ") its licensees and where the relevant Journal is co-owned by BMJ to the co-owners of the Journal, to publish the Work in this journal and any other BMJ products and to exploit all rights, as set out in our [licence](#).

The Submitting Author accepts and understands that any supply made under these terms is made by BMJ to the Submitting Author unless you are acting as an employee on behalf of your employer or a postgraduate student of an affiliated institution which is paying any applicable article publishing charge ("APC") for Open Access articles. Where the Submitting Author wishes to make the Work available on an Open Access basis (and intends to pay the relevant APC), the terms of reuse of such Open Access shall be governed by a Creative Commons licence – details of these licences and which [Creative Commons](#) licence will apply to this Work are set out in our licence referred to above.

Other than as permitted in any relevant BMJ Author's Self Archiving Policies, I confirm this Work has not been accepted for publication elsewhere, is not being considered for publication elsewhere and does not duplicate material already published. I confirm all authors consent to publication of this Work and authorise the granting of this licence.

1  
2  
3  
4 **1. Diabetes in the suburbs of Beijing: epidemiology and risk**  
5  
6  
7 **2 factors: a retrospective cohort study**  
8  
9

10 3

11  
12 4 Lingding Xie\*,<sup>1</sup> Xu Zhao\*,<sup>2</sup> Bo Zhang,<sup>1</sup> Haiqing Zhu <sup>3</sup>  
13  
14 5

15  
16 **6 Author Affiliations**  
17  
18

19  
20 7 <sup>1</sup>Endocrinology Department, China-Japan Friendship Hospital, Beijing/100029, China  
21

22 8 <sup>2</sup>Endocrinology Department, Civil Aviation General Hospital, Beijing/100123, China  
23

24 9 <sup>3</sup> Endocrinology Department, China Meitan General Hospital, Beijing/100028, China  
25  
26  
27

28 10

29 11 \* These authors contributed to the work equally and should be regarded as co-first  
30 12 authors  
31

32 13

33 14 **Correspondence**  
34

35 15 Bo Zhang, MD., Ph.D.  
36

37 16 Department of Endocrinology,  
38

39 17 China-Japan Friendship Hospital,  
40

41 18 No. 2 Yinghua East Street, Chaoyang District,  
42

43 19 Beijing 100029, P.R. China  
44  
45

46 20 Phone: +86-10-84205254  
47

48 21 Fax: +86-10-84205664  
49

50 22 E-mail address: [drbozhang@yahoo.com](mailto:drbozhang@yahoo.com)  
51  
52

53 23  
54

55 24  
56  
57  
58  
59  
60

1  
2  
3  
4 25 **Abstract**

5  
6 26 **Objective** We aimed to detect the incidence and risk factors of type 2 diabetes  
7  
8 27 mellitus (T2DM) development in the suburbs of Beijing.

9  
10 28 **Design** Cohort study with record linkage to incidence data.

11  
12 29 **Setting** We performed a 5-year follow-up study in a randomly selected suburban  
13  
14 30 population including 1,114 subjects aged  $\geq 18$  years living in the suburbs of Beijing.

15  
16 31 **Participants** 118 subjects with T2DM in baseline according to the 1999 WHO  
17  
18 32 criteria were excluded, and 895 subjects attended the follow-up assessment in 2012.  
19  
20 33 The non-diabetic subjects at baseline were classified into two groups: normal glucose  
21  
22 34 tolerance (NGT) group (n=673) and impaired glucose regulation (IGR) group (n=222),  
23  
24 35 the incidence and risk factors of diabetes development in each group were  
25  
26 36 investigated.

27  
28 37 **Outcome measures** a structured questionnaire of sociodemographic characteristics,  
29  
30 38 height, weight, waist circumference, hip circumference and blood pressure, oral  
31  
32 39 glucose tolerance test, serum lipid levels.

33  
34 40 **Results** Out of the 895 non-diabetic subjects, 67 developed diabetes with 29 in NGT  
35  
36 41 group and 38 in IGR group respectively after 5-year follow-up, giving a overall 5-year  
37  
38 42 cumulative incidence of diabetes of 13%. The incidence of diabetes was 15.5 cases  
39  
40 43 per 1000 person-years, while 8.9 cases per 1000 person-years in NGT group and 35.7  
41  
42 44 cases per 1000 person-years in IGR group ( $P < 0.01$ ,  $RR = 4.03$ ,  $95\%CI: 2.58-9.29$ ).

43  
44 45 Binary logistic regression analysis showed that the risk factors of diabetes  
45  
46 46 development included FPG in NGT group, while gender, WHR, FPG and DBP in IGR  
47  
48 47 group.

49  
50 48 **Conclusions:** During a mean follow-up of 5.0 years, the incidence of T2DM in the  
51  
52 49 suburbs of Beijing was 15.5 per 1000 person-years. Early prevention of diabetes  
53  
54 50 should focus on IGR subjects. Elevated FPG predicted diabetes development for both  
55  
56 51 NGT and IGR subjects. Female, overweight/obesity and DBP were risk factors for  
57  
58 52 diabetes development in IGR subjects.  
59  
60

1  
2  
3  
4 53  
5  
6 54  
7  
8 55  
9  
10 56  
11  
12 57  
13  
14 58  
15  
16 59  
17  
18 60  
19  
20 61  
21  
22 62  
23  
24 63  
25  
26 64  
27  
28 65  
29  
30  
31  
32  
33  
34  
35  
36  
37  
38  
39  
40  
41  
42  
43  
44  
45  
46  
47  
48  
49  
50  
51  
52  
53  
54  
55  
56  
57  
58  
59  
60

### **Strengths and limitations of this study**

- Provide new data on the incidence of T2DM in the Beijing area.
- The increase in the FPG level is a strong predictor of diabetes development.
- A cohort selected by multiple stage sampling at baseline.
- A relatively long follow-up period.
- The limitation is that many variables assessed as risk factors were not updated regularly and the data were collected only at the baseline investigation and at the end of the study.

66

## 67 **Introduction**

68 Diabetes mellitus is a clinical syndrome characterized by disordered  
69 glycometabolism. The lack and/or insufficiency of insulin induces metabolic disorders  
70 related to saccharides, lipids, proteins, water and electrolytes, resulting in  
71 hyperglycemia as the main clinical feature. Long-term hyperglycemia leads to  
72 macrovascular and microvascular complications, which may result in disability and  
73 death.<sup>1,2</sup> Diabetes is increasingly prevalent, affecting 451 million (8.4%) adults  
74 worldwide, and these figures are expected to increase to 693 million (9.9%) by 2045.<sup>3</sup>  
75 Type 2 diabetes mellitus (T2DM) accounts for over 90% of diabetes cases. Diabetes,  
76 as a leading cause of death,<sup>1,3,4</sup> is becoming a public issue and placing a heavy burden  
77 on the health care system.<sup>5</sup> In 2017, approximately 5 million deaths of adults  
78 worldwide were attributed to diabetes, and the global healthcare expenditure  
79 associated with people with diabetes was estimated to be \$850 billion.<sup>3</sup>  
80 As T2DM is usually asymptomatic, it can remain undiagnosed for many years.  
81 Almost half of all people (49.7%) living with diabetes were undiagnosed in 2017.<sup>3</sup>  
82 Accordingly, screening for prediabetes/T2DM and preventing the evolution of  
83 diabetes in individuals with risk factors are essential. Currently, it is believed that the  
84 risk factors related to the development of T2DM may include age, body mass index  
85 (BMI), body fat distribution, family history of diabetes, history of cardiovascular  
86 disease (CVD), history of gestational diabetes mellitus (GDM), race/ethnicity, diet,  
87 physical inactivity, hypertension, dyslipidemia and prediabetes.<sup>4,6-14</sup> Some studies  
88 demonstrated that birth weight,<sup>15,16</sup> income,<sup>17</sup> socioeconomic status,<sup>18,19</sup> working  
89 hours,<sup>19,20</sup> occupation<sup>21</sup> and genetic factors<sup>22-24</sup> might also contribute to the  
90 development of T2DM.  
91 Along with the process of urbanization, the aging of the population, changes in  
92 lifestyle, and the increasing prevalence of obesity and overweight, the prevalence of  
93 diabetes in China has increased over the past three decades. The prevalence of

1  
2  
3  
4 94 diabetes in China was 0.67% in 1980,<sup>25</sup> 2.12% in 1995,<sup>26</sup> 5.5% in 2001,<sup>27</sup> 9.7% in  
5  
6 95 2008,<sup>28</sup> 9.7% in 2010<sup>29</sup> and 10.4% in 2013.<sup>30</sup> As the capital, there is limited  
7  
8 96 information regarding the incidence of diabetes and prediabetes in Beijing. Certain  
9  
10 97 studies have suggested that there might be different diabetic risk patterns in Asian  
11  
12 98 populations.<sup>31-34</sup>

13  
14 99 The objective of this study is to determine the incidence of and risk factors for T2DM  
15  
16 100 in the suburbs of Beijing.

## 17 101 **Materials and Methods**

### 18 102 **Study population**

19  
20  
21  
22 103 The study population was residents living in the suburbs (Huairou, Pinggu and  
23  
24 104 Hepingli) of Beijing. Individuals aged 18 years or older who were willing to  
25  
26 105 participate and provided informed consent were eligible to participate in the study.  
27  
28 106 Pregnant women were excluded from the study.

29  
30 107 We performed a 5-year perspective cohort study. Patients or the public were not  
31  
32 108 involved in the design, or conduct, or reporting, or dissemination plans of our  
33  
34 109 research. The baseline survey occurred from June 2007 to September 2008 by a  
35  
36 110 random sampling method with a follow-up examination from May to July 2012. All  
37  
38 111 subjects were asked to undergo a personal interview, physical examination and blood  
39  
40 112 test. Subjects with T2DM at baseline were excluded, and the nondiabetic subjects at  
41  
42 113 baseline were divided into the normal glucose tolerance (NGT) group and the  
43  
44 114 impaired glucose regulation (IGR) group. We analyzed the incidence and risk factors  
45  
46 115 of diabetes development in each group. Diabetes mellitus was defined according to  
47  
48 116 the 1990 WHO criteria or the self-reported prior diagnosis of diabetes with current  
49  
50 117 medication use. IGR was determined if the subjects had a fasting plasma glucose  
51  
52 118 (FPG) level of 6.1-6.9 mmol/L and/or a 2-hour plasma glucose level of 7.8-11.0  
53  
54 119 mmol/L.

### 55 120 **Data collection**

56  
57  
58  
59  
60



1  
2  
3  
4 121 **Sociodemographic characteristics**—Data were collected with a structured  
5  
6 122 questionnaire via a face-to-face interview to assess general information (gender, age,  
7  
8 123 nationality, education status, occupation, per capita income), personal history  
9  
10 124 (smoking history, alcohol history, physical activity, dietary habits), family history  
11  
12 125 (diabetes mellitus, hypertension, hyperlipidemia, myocardial infarction, stroke,  
13  
14 126 obesity), and history of current illness (diabetes, hypertension, hyperlipidemia, and  
15  
16 127 cardiovascular, cerebrovascular diseases, kidney diseases). Subjects who were  
17  
18 128 diagnosed with T2DM between recruitment and the end of follow-up were asked to  
19  
20 129 report the date of diagnosis.

21  
22 130 **Anthropometric measurements** — Subjects were examined for height, weight, waist  
23  
24 131 circumference (WC), hip circumference (HC) and blood pressure. All subjects were  
25  
26 132 asked to take off their shoes, socks, hats and coats, stand erectly and look straight  
27  
28 133 forward with their arms relaxed and their heels together. Height was measured in  
29  
30 134 centimeters using a height bar, and weight was measured in kilograms using a digital  
31  
32 135 weighing scale. The WC was the circumference of the waist at the horizontal line of  
33  
34 136 the umbilicus measured in centimeters using a measuring tape, and the HC was the  
35  
36 137 circumference of hips at the horizontal line of the anterior superior spine measured in  
37  
38 138 centimeters using a measuring tape. BMI was calculated as weight in kilograms  
39  
40 139 divided by the square of height in meters ( $\text{kg}/\text{m}^2$ ), while the waist-to-hip ratio (WHR)  
41  
42 140 was calculated as WC (cm) divided by HC (cm). The blood pressure values used were  
43  
44 141 an average of three measurements, which were taken 2 min apart using a mercury  
45  
46 142 sphygmomanometer. The subjects were asked to stop smoking and consuming alcohol  
47  
48 143 the day before the examination and to sit quietly in a chair for at least 5 min in the  
49  
50 144 half-hour before the measurement with their arms bare and placed at the chest level.

51  
52 145 **Laboratory examination** — Venous blood samples after 8-14 hours of fasting were  
53  
54 146 obtained from subjects for the measurement of FPG, total cholesterol (TC),  
55  
56 147 triglycerides (TGs), high-density lipoprotein cholesterol (HDL-C) and low-density  
57  
58 148 lipoprotein cholesterol (LDL-C). Venous blood samples, after a 75 g oral glucose  
59  
60

1  
2  
3  
4 149 load, were obtained to measure 2-hour plasma glucose (PG2h). Subjects were  
5  
6 150 instructed to maintain normal physical activity without dietary limit (the intake of  
7  
8 151 saccharides should be no less than 150 g per day) before proceeding with the oral  
9  
10 152 glucose tolerance test.

### 11 153 **Statistical analysis**

12  
13  
14 154 The differences in continuous and categorical variables between the NGT group and  
15  
16 155 IGR group were examined using the t test and the  $\chi^2$  test statistic, respectively.  
17  
18 156 Kaplan-Meier survival estimates were used to calculate the 5-year cumulative  
19  
20 157 incidence of T2DM. The log-rank test was used to compare the survival curves. The  
21  
22 158 Mantel-Haenszel  $\chi^2$  test of trends was used to analyze the ordinal data. Binary logistic  
23  
24 159 regression analyses were used to estimate the odds ratio and 95% confidence interval  
25  
26 160 for the development of diabetes. All analyses were performed using SPSS statistical  
27  
28 161 software version 17.0, and a P value<0.05 was considered statistically significant.

### 29 162 **Results**

#### 30 163 **Characteristics of the study population at baseline**

31  
32  
33  
34 164 A total of 1,114 residents participated in the study, and 1,014 subjects completed the  
35  
36 165 follow-up, with an overall response rate of 91.0%. After eliminating 118 subjects who  
37  
38 166 were diagnosed with diabetes at baseline and one subject with severe data deficiency,  
39  
40 167 895 subjects (308 men and 587 women) with a mean age of 48.1±11.9 years were  
41  
42 168 included in the analysis, with 673 in the NGT group and 222 in the IGR group. The  
43  
44 169 baseline characteristics of the 895 subjects in the study are shown in Table 1.  
45  
46 170 Continuous variables are expressed as the mean±standard deviation (sd) and were  
47  
48 171 examined using the t test, while categorical variables are expressed as percentages and  
49  
50 172 were examined using the  $\chi^2$  test. There was no significant difference between the NGT  
51  
52 173 group and the IGR group in gender, height, family history of T2DM, smoking history,  
53  
54 174 alcohol history, exercise time, diastolic blood pressure (DBP) or HDL-C. The  
55  
56 175 differences between the two groups in age, weight, BMI, WC, WHR, systolic blood  
57  
58  
59  
60

1  
2  
3  
4 176 pressure (SBP), FPG, PG2h, TGs, TC, LDL-C and duration of follow-up was  
5  
6 177 statistically significant.

### 7 178 **Incidence of T2DM**

8  
9  
10 179 During the follow-up, T2DM developed in 67 subjects, 29 in the NGT group and 38  
11  
12 180 in the IGR group, resulting in T2DM onset rates of 15.45, 8.86 and 35.67 per 1,000  
13  
14 181 person-years in the total study population, the NGT group and the IGR group,  
15  
16 182 respectively (Table 2). The difference in the incidence of T2DM between the NGT  
17  
18 183 group and the IGR group was statistically significant ( $\chi^2=37.38$ ,  $P<0.01$ ,  $RR=4.03$ ,  
19  
20 184 95% CI: 2.58-9.29).

21  
22 185 The 5-year cumulative incidence of T2DM was 13%, with 10% in the NGT group and  
23  
24 186 20% in the IGR group. The mean follow-up duration was 5.008 years (SE=0.013,  
25  
26 187 95% CI: 4.982-5.033), with 5.003 years (SE=0.012, 95% CI: 5.010-5.056) in the NGT  
27  
28 188 group and 4.933 years (SE=0.038, 95% CI: 4.859-5.007) in the IGR group. Using the  
29  
30 189 log-rank test, we found that the cumulative incidence of T2DM in the IGR group was  
31  
32 190 significantly higher than that in the NGT group ( $\chi^2=36.905$ ,  $P<0.0001$ ). The results  
33  
34 191 of the Kaplan-Meier survival analyses are shown in Figure 1.

### 35 36 192 **Analyses of the risk factors for diabetes development**

37  
38 193 The results of binary logistic regression analyses for the development of T2DM in the  
39  
40 194 NGT and IGR groups are shown in Table 3. FPG contributed to the development of  
41  
42 195 T2DM in the NGT group, and the OR was 6.111 (1.379, 27.070;  $P=0.017$ ). Gender,  
43  
44 196 WHR, DBP, and FFB contributed to the development of T2DM in the IGR group, and  
45  
46 197 the ORs were 7.293 (1.074, 49.549,  $P=0.042$ ), 2.874E8 (8.386, 9.847E15;  $P=0.028$ ),  
47  
48 198 1.068 (1.009, 1.130;  $P=0.024$ ) and 7.243 (2.314, 22.673;  $P=0.001$ ), respectively. The  
49  
50 199 increase in exercise time slightly decreased the risk of T2DM in the IGR group, with  
51  
52 200 an OR of 0.923 (0.847, 1.005;  $P=0.066$ ).

### 53 54 201 **Discussion**

55  
56 202 The prevalence of diabetes mellitus has been increasing markedly in recent decades.  
57  
58 203 Among adults aged from 20-79 years in 2017, there were an estimated 425 million  
59  
60

1  
2  
3  
4 204 cases of diabetes<sup>3</sup>. However, the astonishing prevalence may be partly attributable to  
5  
6 205 the increase in population and the prolongation of the life-span.<sup>35</sup> Accordingly, we  
7  
8 206 studied the growing trend of T2DM by investigating the cumulative incidence of  
9  
10 207 T2DM. Our results showed that 15.45 new cases of diabetes per 1,000 people-years  
11  
12 208 were diagnosed during the five-year observation period (2007-2012). This marked  
13  
14 209 trend is consistent with diabetes incidence rates worldwide, such as those described in  
15  
16 210 the ATTICA study in Greece (12.9 cases per 1,000 person-years from 2002 to 2012)<sup>36</sup>  
17  
18 211 and those described in a study conducted in Mexico (12.7 cases per 1,000 person-  
19  
20 212 years from 1990 to 2008).<sup>37</sup> The incidence rate found in our study is lower than that in  
21  
22 213 a study of Pima Indians (23.5 cases per 1,000 person-years during 1991 to 2003)<sup>38</sup> and  
23  
24 214 in a study conducted in northern Spain (95.2 cases per 1,000 person-years during  
25  
26 215 1998 to 2005)<sup>39</sup> and is higher than that observed in a study conducted in Iran (10.6  
27  
28 216 cases per 1000 person-years from 1999 to 2011)<sup>40</sup> and in the SUPREME-DM project  
29  
30 217 in the USA (11.5 cases per 1000 person-years from 2006 to 2011).<sup>41</sup> The T2DM  
31  
32 218 incidence in the suburbs of Beijing is higher than that identified in the investigation  
33  
34 219 conducted by Wang C et al in a Chinese population in 2010 (9.5 cases per 1000  
35  
36 220 person-years in men and 9.2 in women).<sup>42</sup> This difference may partly be due to the  
37  
38 221 relatively higher standard of living in the suburbs of Beijing.  
39  
40 222 The development of diabetes is based on the interaction between genes and lifestyle  
41  
42 223 and environmental factors.<sup>43,44</sup> Compared with the NGT group that had an incidence  
43  
44 224 of 8.86 cases per 1,000 person-years, the IGR group (35.67 cases per 1,000 person-  
45  
46 225 years) had a higher incidence rate (RR=4.03, 95% CI: 2.58-9.29, P<0.01). In our  
47  
48 226 study, the development of diabetes was mainly the consequence of elevated FPG in  
49  
50 227 the NGT group. Diabetes development was mainly associated with sex (female),  
51  
52 228 abnormal WHR, elevated DBP and elevated FPG in the IGR group. The increase in  
53  
54 229 the FPG level was a strong predictor of diabetes development in both the NGT group  
55  
56 230 and the IGR group, with 6.111- and 7.243-times increased risk per unit increase,  
57  
58 231 respectively.  
59  
60

1  
2  
3  
4  
5  
6  
7  
8  
9  
10  
11  
12  
13  
14  
15  
16  
17  
18  
19  
20  
21  
22  
23  
24  
25  
26  
27  
28  
29  
30  
31  
32  
33  
34  
35  
36  
37  
38  
39  
40  
41  
42  
43  
44  
45  
46  
47  
48  
49  
50  
51  
52  
53  
54  
55  
56  
57  
58  
59  
60

232 In our study, the WHR measurement was found to predict diabetes risk. Some studies  
233 have declared that WHR, as an obesity indicator, was superior to BMI and WC.<sup>45,46</sup> A  
234 meta-analysis demonstrated that either BMI or WC (WHR) predicted or was  
235 independently associated with type 2 diabetes, regardless of the controversial findings  
236 regarding which one was better.<sup>47</sup>

237 Age and family history of diabetes were widely believed to be risk factors for diabetes  
238 development.<sup>4,6-14</sup> However, we found only an increasing trend of diabetes  
239 development in the elderly population and in subjects with a family history of  
240 diabetes ( $P > 0.05$ ). This finding might be related to the short period of follow-up and  
241 the subjects' unawareness of their family history of diabetes.

242 There is evidence that T2DM can be prevented in high-risk individuals by a lifestyle  
243 program of regular exercise.<sup>48,49</sup> Surprisingly, our study found that exercise did not  
244 exert a beneficial effect on diabetes incidence, a finding similar to that of the  
245 ATTICA study.<sup>36,50</sup> However, we did find a decreasing trend in diabetes incidence  
246 with increasing exercise time. The increase in exercise time slightly decreased the risk  
247 of T2DM in the IGR group, with an OR of 0.923 (0.847, 1.005;  $P=0.066$ ).

248 The strengths of our study are that the study was based on a cohort selected by  
249 multiple stage sampling at baseline with a relatively long follow-up period. The  
250 limitation is that many variables assessed as risk factors were not updated regularly,  
251 which might have changed during the follow-up period, and the data were collected  
252 only at the baseline investigation and at the end of the study.

### 253 **Conclusions**

254 During a mean follow-up of 5.0 years, the incidence of T2DM in the suburbs of  
255 Beijing was 15.45 cases per 1000 person-years, which was relatively higher than the  
256 incidence in many other areas worldwide. Compared with the NGT subjects, the IGR  
257 subjects were more susceptible to T2DM. To prevent diabetes development, all  
258 subjects should pay special attention to elevated FPG. In addition, sex, WHR, and  
259 DBP were predictors of T2DM in IGR subjects.

1  
2  
3  
4 260 The findings in this study provide new data on the incidence of T2DM in the Beijing  
5  
6 261 area. The predictors of T2DM reported in the present study may be conducive to  
7  
8 262 formulating a protocol for diabetes prevention.  
9

### 10 263 **Authors' contributions**

11  
12  
13  
14 264 Conceptualization, B.Z.; Data curation, H.Z.; Formal analysis, H.Z.; Investigation,  
15  
16  
17 265 L.X. and X.Z.; Methodology, B.Z.; Project administration, L.X., X.Z. and B.Z.;  
18  
19  
20 266 Writing – original draft, L.X. and X.Z.; Writing – review & editing, B.Z.. All authors  
21  
22  
23 267 read and approved the final manuscript, as well as the submission of this work. B.Z.  
24  
25  
26 268 supervised and managed the data. B.Z. is the guarantor of this work.  
27  
28  
29

### 30 270 **Conflicts of interest**

31  
32 271 The authors declare that they have no conflicts of interest.  
33  
34 272

### 35 36 273 **Funding statement**

37  
38 274 The study was supported by grants from the 11th five-year national science and  
39  
40 275 technology support program (2009BAI80B04).  
41  
42 276

### 43 277 **Ethics approval**

44  
45 278 Ethical approval was gained from Ethics Committee of Clinical Trials of  
46  
47  
48 279 Drugs/Devices in China-Japan Friendship Hospital (2011-049).  
49  
50  
51  
52  
53  
54  
55  
56  
57  
58  
59  
60

281 **Table 1 Comparison of characteristics of the NGT and IGR subjects at baseline**

| Variable at baseline         | NGT group<br>(n=673) | IGR group<br>(n=222) | t or $\chi^2$ , <i>P</i><br>value |
|------------------------------|----------------------|----------------------|-----------------------------------|
| Gender (%male)               | 34.9                 | 32.9                 | 0.306, 0.625                      |
| Age (years)                  | 46.75±11.57          | 52.01±12.03          | -5.813, 0.000                     |
| Height (cm)                  | 161.85±7.94          | 161.18±7.83          | 1.092, 0.275                      |
| Weight (kg)                  | 64.32±10.75          | 67.49±11.05          | -3.777, 0.000                     |
| BMI (kg/m <sup>2</sup> )     | 24.52±3.40           | 25.93±3.50           | -5.332, 0.000                     |
| WC (cm)                      | 83.04±9.75           | 86.82±9.20           | -5.075, 0.000                     |
| WHR                          | 0.87±0.07            | 0.89±0.06            | -3.495, 0.000                     |
| SBP (mmHg)                   | 119.71±18.37         | 125.18±20.13         | -3.582, 0.000                     |
| DBP (mmHg)                   | 78.02±11.21          | 79.75±12.66          | -1.843, 0.066                     |
| FPG (mmol/L)                 | 5.25±0.42            | 5.82±0.61            | -15.875,<br>0.000                 |
| PG2h (mmol/L)                | 5.90±1.01            | 8.29±1.52            | -26.692,<br>0.000                 |
| TGs (mmol/L)                 | 1.42±1.17            | 1.61±1.08            | -2.165, 0.031                     |
| TC (mmol/L)                  | 4.56±0.92            | 4.84±0.95            | -3.865, 0.000                     |
| HDL-C (mmol/L)               | 1.35±0.34            | 1.34±0.36            | 0.464, 0.643                      |
| LDL-C (mmol/L)               | 2.77±0.77            | 3.08±0.81            | -4.648, 0.000                     |
| Exercise duration<br>(hours) | 5.85±11.81           | 5.59±8.06            | 0.305, 0.761                      |
| FH of T2DM (%)               | 15.5                 | 21.4                 | 3.722, 0.068                      |
| Smoking history (%)          | 22.4                 | 20.7                 | 0.286, 0.641                      |
| Alcohol history (%)          | 27.9                 | 28.8                 | 0.076, 0.796                      |
| Years of follow-up<br>(year) | 4.85±0.32            | 4.79±0.56            | 2.081, 0.038                      |

1  
2  
3  
4 282 BMI, body mass index; WC, waist circumference; WHR, waist-to-hip ratio; SBP,  
5  
6 283 systolic blood pressure; DBP, diastolic blood pressure; FPG, fasting plasma glucose;  
7  
8 284 PG2h, 2-hour plasma glucose; TC, total cholesterol; TGs, triglycerides; HDL-C, high-  
9  
10 285 density lipoprotein cholesterol; LDL-C, low-density lipoprotein cholesterol; FH,  
11  
12 286 family history. Exercise duration is expressed as hours per week.  
13  
14 287

15  
16  
17  
18  
19  
20  
21  
22  
23  
24  
25  
26  
27  
28  
29  
30  
31  
32  
33  
34  
35  
36  
37  
38  
39  
40  
41  
42  
43  
44  
45  
46  
47  
48  
49  
50  
51  
52  
53  
54  
55  
56  
57  
58  
59  
60

For peer review only



1  
2  
3  
4  
5  
6  
7  
8  
9  
10  
11  
12  
13  
14  
15  
16  
17  
18  
19  
20  
21  
22  
23  
24  
25  
26  
27  
28  
29  
30  
31  
32  
33  
34  
35  
36  
37  
38  
39  
40  
41  
42  
43  
44  
45  
46  
47  
48  
49  
50  
51  
52  
53  
54  
55  
56  
57  
58  
59  
60288 **Table 2. The incidence of T2DM during the follow-up**

|           | Cases of diabetes | Follow-up (person-<br>years) | Incidence (per 1,000<br>person-years) |
|-----------|-------------------|------------------------------|---------------------------------------|
| NGT group | 29                | 3,271.5                      | 8.86                                  |
| IGR group | 38                | 1,065.3                      | 35.67                                 |
| Total     | 67                | 4,336.8                      | 15.45                                 |

289

290

For peer review only

291 **Table 3. Multivariate logistic regression model for the development of T2DM**

|                           | NGT group               |                | IGR group                 |                |
|---------------------------|-------------------------|----------------|---------------------------|----------------|
|                           | OR (95% CI)             | <i>P</i> value | OR (95% CI)               | <i>P</i> value |
| Sex                       | 0.375 (0.067, 2.103)    | 0.265          | 7.293 (1.074, 49.549)     | 0.042          |
| Age (years)               | 1.013 (0.962, 1.068)    | 0.615          | 1.019 (0.964, 1.077)      | 0.499          |
| Weight (kg)               | 1.044 (0.927, 1.175)    | 0.478          | 1.056 (0.929, 1.200)      | 0.402          |
| BMI (kg/m <sup>2</sup> )  | 0.934 (0.653, 1.336)    | 0.710          | 0.971 (0.661, 1.427)      | 0.881          |
| WC (cm)                   | 1.073 (0.936, 1.230)    | 0.311          | 0.904 (0.748, 1.092)      | 0.295          |
| WHR                       | 0.006 (0.000, 7058.081) | 0.473          | 2.874E8 (8.386, 9.847E15) | 0.028          |
| SBP (mmHg)                | 1.013 (0.976, 1.052)    | 0.492          | 0.992 (0.958, 1.026)      | 0.637          |
| DBP (mmHg)                | 0.955 (0.890, 1.024)    | 0.198          | 1.068 (1.009, 1.130)      | 0.024          |
| FPG (mmol/L)              | 6.111 (1.379, 27.070)   | 0.017          | 7.243 (2.314, 22.673)     | 0.001          |
| TC (mmol/L)               | 2.719 (0.917, 8.067)    | 0.071          | 0.814 (0.141, 4.699)      | 0.818          |
| TGs (mmol/L)              | 0.996 (0.589, 1.684)    | 0.989          | 0.926 (0.491, 1.749)      | 0.813          |
| HDL-C (mmol/L)            | 2.536 (0.519, 12.395)   | 0.250          | 0.622 (0.071, 5.460)      | 0.669          |
| LDL-C (mmol/L)            | 0.604 (0.206, 1.769)    | 0.358          | 1.070 (0.181, 6.321)      | 0.941          |
| Exercise duration (hours) | 1.013 (0.947, 1.084)    | 0.707          | 0.923 (0.847, 1.005)      | 0.066          |
| FH of T2DM                | 1.868 (0.492, 7.090)    | 0.358          | 2.062 (0.656, 6.478)      | 0.215          |
| Smoking history           | 0.766 (0.186, 3.162)    | 0.713          | 1.591 (0.346, 7.317)      | 0.551          |
| Alcohol history           | 0.726 (0.202, 2.610)    | 0.624          | 1.685 (0.458, 6.203)      | 0.432          |

292 BMI, body mass index; WC, waist circumference; WHR, waist-to-hip ratio; SBP,  
 293 systolic blood pressure; DBP, diastolic blood pressure; FPG, fasting plasma glucose;  
 294 TC, total cholesterol; TGs, triglycerides; HDL-C, high-density lipoprotein cholesterol;  
 295 LDL-C, low-density lipoprotein cholesterol; FH, family history. Gender was defined  
 296 as male (n=1) or female (n=2), FH of T2DM was defined as no (n=1) or yes (n=2),

1  
2  
3  
4  
5  
6  
7  
8  
9  
10  
11  
12  
13  
14  
15  
16  
17  
18  
19  
20  
21  
22  
23  
24  
25  
26  
27  
28  
29  
30  
31  
32  
33  
34  
35  
36  
37  
38  
39  
40  
41  
42  
43  
44  
45  
46  
47  
48  
49  
50  
51  
52  
53  
54  
55  
56  
57  
58  
59  
60

297 smoking history was defined as no (n=1) or yes (n=2), and alcohol history was  
298 defined as no (n=1) or yes (n=2). Exercise duration was expressed as hours per week.  
299  
300  
301

For peer review only

1  
2  
3  
4 302 **Figure legend**

5  
6 303 Figure 1. Cumulative incidence of T2DM in the NGT group and the IGR group (log-  
7  
8 304 rank test:  $\chi^2=36.905$ ,  $P<0.0001$ )

9 305

10 306

11 307

12 308

13 309

14  
15  
16  
17  
18  
19  
20  
21  
22  
23  
24  
25  
26  
27  
28  
29  
30  
31  
32  
33  
34  
35  
36  
37  
38  
39  
40  
41  
42  
43  
44  
45  
46  
47  
48  
49  
50  
51  
52  
53  
54  
55  
56  
57  
58  
59  
60

For peer review only

310 **References**

- 311 1. Mortality GBD, Causes of Death C. Global, regional, and national age-sex specific all-cause and  
312 cause-specific mortality for 240 causes of death, 1990-2013: a systematic analysis for the Global  
313 Burden of Disease Study 2013. *Lancet* 2015;385:117-171.
- 314 2. Wong E, Backholer K, Gearon E, et al. Diabetes and risk of physical disability in adults: a  
315 systematic review and meta-analysis. *Lancet Diabetes Endocrinol* 2013;1:106-114.
- 316 3. Cho NH, Shaw JE, Karuranga S, et al. IDF Diabetes Atlas: Global estimates of diabetes  
317 prevalence for 2017 and projections for 2045. *Diabetes Res Clin Pract* 2018;138:271-281.
- 318 4. Mc Donald Posso AJ, Bradshaw Meza RA, Mendoza Morales EA, et al. Diabetes in Panama:  
319 Epidemiology, Risk Factors, and Clinical Management. *Ann Glob Health* 2015;81:754-764.
- 320 5. Bommer C, Sagalova V, Heeseemann E, et al. Global Economic Burden of Diabetes in Adults:  
321 Projections From 2015 to 2030. *Diabetes Care* 2018;41:963-970.
- 322 6. Weber MB, Oza-Frank R, Staimez LR, et al. Type 2 diabetes in Asians: prevalence, risk factors,  
323 and effectiveness of behavioral intervention at individual and population levels. *Annu Rev Nutr*  
324 2012;32:417-439.
- 325 7. Perez CM, Soto-Salgado M, Suarez E, et al. High Prevalence of Diabetes and Prediabetes and  
326 Their Coexistence with Cardiovascular Risk Factors in a Hispanic Community. *J Immigr Minor Health*  
327 2015;17:1002-1009.
- 328 8. Aljoudi AS, Taha AZ. Knowledge of diabetes risk factors and preventive measures among  
329 attendees of a primary care center in eastern Saudi Arabia. *Ann Saudi Med* 2009;29:15-19.
- 330 9. American Diabetes A. 2. Classification and Diagnosis of Diabetes: Standards of Medical Care in  
331 Diabetes-2018. *Diabetes Care* 2018;41:S13-S27.
- 332 10. Fletcher B, Gulanick M, Lamendola C. Risk factors for type 2 diabetes mellitus. *J Cardiovasc*  
333 *Nurs* 2002;16:17-23.
- 334 11. Karter AJ, Schillinger D, Adams AS, et al. Elevated rates of diabetes in Pacific Islanders and  
335 Asian subgroups: The Diabetes Study of Northern California (DISTANCE). *Diabetes Care*  
336 2013;36:574-579.
- 337 12. Harjo TC, Perez A, Lopez V, et al. Prevalence of diabetes and cardiovascular risk factors among  
338 California Native American adults compared to other ethnicities: the 2005 California Health Interview  
339 Survey. *Metab Syndr Relat Disord* 2011;9:49-54.
- 340 13. Akter S, Rahman MM, Abe SK, et al. Prevalence of diabetes and prediabetes and their risk factors  
341 among Bangladeshi adults: a nationwide survey. *Bull World Health Organ* 2014;92:204-213, 213A.
- 342 14. Amarasinghe S, Balakumar S, Arasaratnam V. Prevalence and risk factors of diabetes mellitus  
343 among adults in Jaffna District. *Ceylon Med J* 2015;60:107-110.
- 344 15. Pettitt DJ, Jovanovic L. Low birth weight as a risk factor for gestational diabetes, diabetes, and  
345 impaired glucose tolerance during pregnancy. *Diabetes Care* 2007;30 Suppl 2:S147-149.
- 346 16. Harder T, Rodekamp E, Schellong K, et al. Birth weight and subsequent risk of type 2 diabetes: a  
347 meta-analysis. *Am J Epidemiol* 2007;165:849-857.
- 348 17. Barker L, Crespo R, Gerzoff RB, et al. Residence in a distressed county in Appalachia as a risk  
349 factor for diabetes, Behavioral Risk Factor Surveillance System, 2006-2007. *Prev Chronic Dis*  
350 2010;7:A104.

- 1  
2  
3 351 18. Espelt A, Arriola L, Borrell C, et al. Socioeconomic position and type 2 diabetes mellitus in  
4 352 Europe 1999-2009: a panorama of inequalities. *Curr Diabetes Rev* 2011;7:148-158.
- 5 353 19. Kivimaki M, Virtanen M, Kawachi I, et al. Long working hours, socioeconomic status, and the  
6 354 risk of incident type 2 diabetes: a meta-analysis of published and unpublished data from 222 120  
7 355 individuals. *Lancet Diabetes Endocrinol* 2015;3:27-34.
- 8 356 20. Bannai A, Yoshioka E, Saijo Y, et al. The Risk of Developing Diabetes in Association With Long  
9 357 Working Hours Differs by Shift Work Schedules. *J Epidemiol* 2016;26:481-487.
- 10 358 21. Honda T, Kuwahara K, Nakagawa T, et al. Leisure-time, occupational, and commuting physical  
11 359 activity and risk of type 2 diabetes in Japanese workers: a cohort study. *BMC Public Health*  
12 360 2015;15:1004.
- 13 361 22. Ma RC, Hu C, Tam CH, et al. Genome-wide association study in a Chinese population identifies a  
14 362 susceptibility locus for type 2 diabetes at 7q32 near PAX4. *Diabetologia* 2013;56:1291-1305.
- 15 363 23. Grarup N, Sandholt CH, Hansen T, et al. Genetic susceptibility to type 2 diabetes and obesity:  
16 364 from genome-wide association studies to rare variants and beyond. *Diabetologia* 2014;57:1528-1541.
- 17 365 24. Florez JC, Jablonski KA, Bayley N, et al. TCF7L2 polymorphisms and progression to diabetes in  
18 366 the Diabetes Prevention Program. *N Engl J Med* 2006;355:241-250.
- 19 367 25. Guop NDrC. A mass survey of diabetes mellitus in a population of 300,000 in 14 provinces and  
20 368 municipalities in China (author's transl). *Zhonghua Nei Ke Za Zhi* 1981;20:678-683.
- 21 369 26. Pan XR, Yang WY, Li GW, et al. Prevalence of diabetes and its risk factors in China, 1994.  
22 370 National Diabetes Prevention and Control Cooperative Group. *Diabetes Care* 1997;20:1664-1669.
- 23 371 27. Chan JC, Malik V, Jia W, et al. Diabetes in Asia: epidemiology, risk factors, and  
24 372 pathophysiology. *JAMA* 2009;301:2129-2140.
- 25 373 28. Yang W, Lu J, Weng J, et al. Prevalence of diabetes among men and women in China. *N Engl J*  
26 374 *Med* 2010;362:1090-1101.
- 27 375 29. Xu Y, Wang L, He J, et al. Prevalence and control of diabetes in Chinese adults. *JAMA*  
28 376 2013;310:948-959.
- 29 377 30. Wang L, Gao P, Zhang M, et al. Prevalence and Ethnic Pattern of Diabetes and Prediabetes in  
30 378 China in 2013. *JAMA* 2017;317:2515-2523.
- 31 379 31. Narayan KM, Aviles-Santa L, Oza-Frank R, et al. Report of a National Heart, Lung, And Blood  
32 380 Institute Workshop: heterogeneity in cardiometabolic risk in Asian Americans In the U.S.  
33 381 Opportunities for research. *J Am Coll Cardiol* 2010;55:966-973.
- 34 382 32. Oza-Frank R, Ali MK, Vaccarino V, et al. Asian Americans: diabetes prevalence across U.S. and  
35 383 World Health Organization weight classifications. *Diabetes Care* 2009;32:1644-1646.
- 36 384 33. Ma RC, Chan JC. Type 2 diabetes in East Asians: similarities and differences with populations in  
37 385 Europe and the United States. *Ann N Y Acad Sci* 2013;1281:64-91.
- 38 386 34. Gujral UP, Pradeepa R, Weber MB, et al. Type 2 diabetes in South Asians: similarities and  
39 387 differences with white Caucasian and other populations. *Ann N Y Acad Sci* 2013;1281:51-63.
- 40 388 35. Gulland A. Global life expectancy has risen, reports WHO. *BMJ* 2014;348:g3369.
- 41 389 36. Koloverou E, Panagiotakos DB, Pitsavos C, et al. 10-year incidence of diabetes and associated  
42 390 risk factors in Greece: the ATTICA study (2002-2012). *Rev Diabet Stud* 2014;11:181-189.
- 43  
44  
45  
46  
47  
48  
49  
50  
51  
52  
53  
54  
55  
56  
57  
58  
59  
60

1  
2  
3  
4  
5  
6  
7  
8  
9  
10  
11  
12  
13  
14  
15  
16  
17  
18  
19  
20  
21  
22  
23  
24  
25  
26  
27  
28  
29  
30  
31  
32  
33  
34  
35  
36  
37  
38  
39  
40  
41  
42  
43  
44  
45  
46  
47  
48  
49  
50  
51  
52  
53  
54  
55  
56  
57  
58  
59  
60

- 391 37. Gonzalez-Villalpando C, Davila-Cervantes CA, Zamora-Macorra M, et al. Incidence of type 2  
392 diabetes in Mexico: results of the Mexico City Diabetes Study after 18 years of follow-up. *Salud*  
393 *Publica Mex* 2014;56:11-17.
- 394 38. Pavkov ME, Hanson RL, Knowler WC, et al. Changing patterns of type 2 diabetes incidence  
395 among Pima Indians. *Diabetes Care* 2007;30:1758-1763.
- 396 39. Valdes S, Botas P, Delgado E, et al. Population-based incidence of type 2 diabetes in northern  
397 Spain: the Asturias Study. *Diabetes Care* 2007;30:2258-2263.
- 398 40. Derakhshan A, Sardarinia M, Khalili D, et al. Sex specific incidence rates of type 2 diabetes and  
399 its risk factors over 9 years of follow-up: Tehran Lipid and Glucose Study. *PLoS One* 2014;9:e102563.
- 400 41. Nichols GA, Schroeder EB, Karter AJ, et al. Trends in diabetes incidence among 7 million  
401 insured adults, 2006-2011: the SUPREME-DM project. *Am J Epidemiol* 2015;181:32-39.
- 402 42. Wang C, Li J, Xue H, et al. Type 2 diabetes mellitus incidence in Chinese: contributions of  
403 overweight and obesity. *Diabetes Res Clin Pract* 2015;107:424-432.
- 404 43. Murea M, Ma L, Freedman BI. Genetic and environmental factors associated with type 2 diabetes  
405 and diabetic vascular complications. *Rev Diabet Stud* 2012;9:6-22.
- 406 44. InterAct C, Langenberg C, Sharp S, et al. Design and cohort description of the InterAct Project:  
407 an examination of the interaction of genetic and lifestyle factors on the incidence of type 2 diabetes in  
408 the EPIC Study. *Diabetologia* 2011;54:2272-2282.
- 409 45. Zhao X, Zhu X, Zhang H, et al. Prevalence of diabetes and predictions of its risks using  
410 anthropometric measures in southwest rural areas of China. *BMC Public Health* 2012;12:821.
- 411 46. Gupta R, Rastogi P, Sarna M, et al. Body-mass index, waist-size, waist-hip ratio and  
412 cardiovascular risk factors in urban subejcts. *J Assoc Physicians India* 2007;55:621-627.
- 413 47. Qiao Q, Nyamdorj R. Is the association of type II diabetes with waist circumference or waist-to-  
414 hip ratio stronger than that with body mass index? *Eur J Clin Nutr* 2010;64:30-34.
- 415 48. Dela F, Prats C, Helge JW. Exercise interventions to prevent and manage type 2 diabetes:  
416 physiological mechanisms. *Med Sport Sci* 2014;60:36-47.
- 417 49. Teixeira-Lemos E, Nunes S, Teixeira F, et al. Regular physical exercise training assists in  
418 preventing type 2 diabetes development: focus on its antioxidant and anti-inflammatory properties.  
419 *Cardiovasc Diabetol* 2011;10:12.
- 420 50. Panagiotakos DB, Pitsavos C, Skoumas Y, et al. Five-year incidence of type 2 diabetes mellitus  
421 among cardiovascular disease-free Greek adults: findings from the ATTICA study. *Vasc Health Risk*  
422 *Manag* 2008;4:691-698.

423

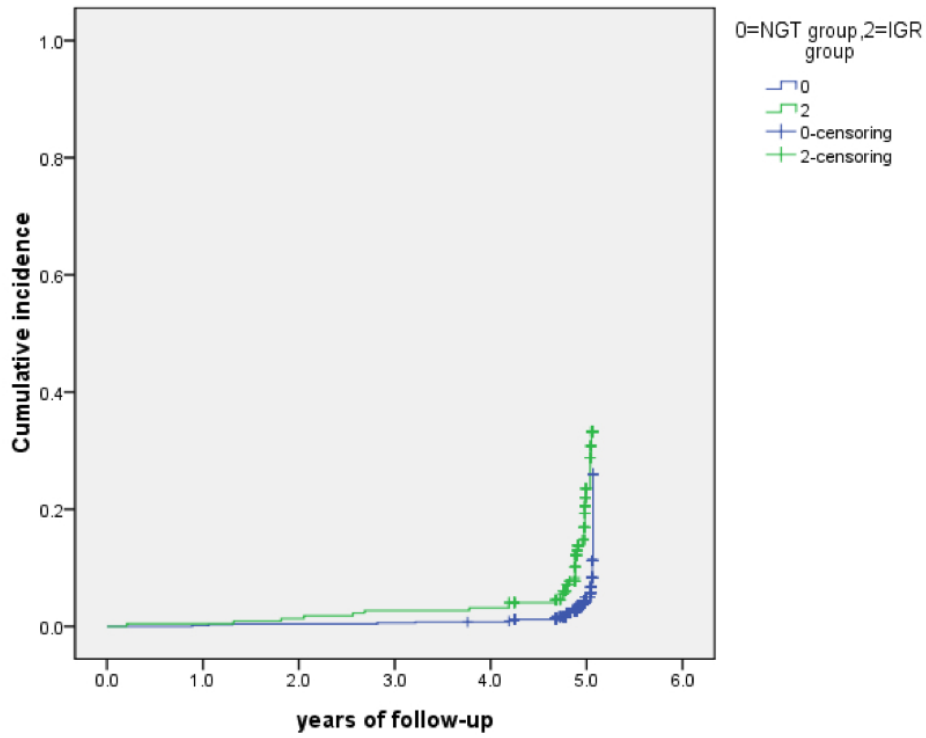



STROBE Statement—Checklist of items that should be included in reports of *cohort studies*

|                           | Item No | Recommendation                                                                                                                                                                                                                                                                                                         | Page No |
|---------------------------|---------|------------------------------------------------------------------------------------------------------------------------------------------------------------------------------------------------------------------------------------------------------------------------------------------------------------------------|---------|
| <b>Title and abstract</b> | 1       | (a) Indicate the study's design with a commonly used term in the title or the abstract                                                                                                                                                                                                                                 | 1       |
|                           |         | (b) Provide in the abstract an informative and balanced summary of what was done and what was found                                                                                                                                                                                                                    | 2       |
| <b>Introduction</b>       |         |                                                                                                                                                                                                                                                                                                                        |         |
| Background/rationale      | 2       | Explain the scientific background and rationale for the investigation being reported                                                                                                                                                                                                                                   | 5       |
| Objectives                | 3       | State specific objectives, including any prespecified hypotheses                                                                                                                                                                                                                                                       | 6       |
| <b>Methods</b>            |         |                                                                                                                                                                                                                                                                                                                        |         |
| Study design              | 4       | Present key elements of study design early in the paper                                                                                                                                                                                                                                                                | 6       |
| Setting                   | 5       | Describe the setting, locations, and relevant dates, including periods of recruitment, exposure, follow-up, and data collection                                                                                                                                                                                        |         |
| Participants              | 6       | (a) Give the eligibility criteria, and the sources and methods of selection of participants. Describe methods of follow-up                                                                                                                                                                                             | 7       |
|                           |         | (b) For matched studies, give matching criteria and number of exposed and unexposed                                                                                                                                                                                                                                    | 7       |
| Variables                 | 7       | Clearly define all outcomes, exposures, predictors, potential confounders, and effect modifiers. Give diagnostic criteria, if applicable                                                                                                                                                                               | 7       |
| Data sources/measurement  | 8*      | For each variable of interest, give sources of data and details of methods of assessment (measurement). Describe comparability of assessment methods if there is more than one group                                                                                                                                   | 7       |
| Bias                      | 9       | Describe any efforts to address potential sources of bias                                                                                                                                                                                                                                                              | 7       |
| Study size                | 10      | Explain how the study size was arrived at                                                                                                                                                                                                                                                                              | 7       |
| Quantitative variables    | 11      | Explain how quantitative variables were handled in the analyses. If applicable, describe which groupings were chosen and why                                                                                                                                                                                           | 7       |
| Statistical methods       | 12      | (a) Describe all statistical methods, including those used to control for confounding<br>(b) Describe any methods used to examine subgroups and interactions<br>(c) Explain how missing data were addressed<br>(d) If applicable, explain how loss to follow-up was addressed<br>(e) Describe any sensitivity analyses | 8       |
| <b>Results</b>            |         |                                                                                                                                                                                                                                                                                                                        |         |
| Participants              | 13*     | (a) Report numbers of individuals at each stage of study—eg numbers potentially eligible, examined for eligibility, confirmed eligible, included in the study, completing follow-up, and analysed<br>(b) Give reasons for non-participation at each stage<br>(c) Consider use of a flow diagram                        | 8       |
| Descriptive data          | 14*     | (a) Give characteristics of study participants (eg demographic, clinical, social) and information on exposures and potential confounders<br>(b) Indicate number of participants with missing data for each variable of interest<br>(c) Summarise follow-up time (eg, average and total amount)                         | 8       |
| Outcome data              | 15*     | Report numbers of outcome events or summary measures over time                                                                                                                                                                                                                                                         | 9       |

|    |                          |    |                                                                                                                                                                                                              |    |
|----|--------------------------|----|--------------------------------------------------------------------------------------------------------------------------------------------------------------------------------------------------------------|----|
| 1  | Main results             | 16 | (a) Give unadjusted estimates and, if applicable, confounder-adjusted estimates and their precision (eg, 95% confidence interval). Make clear which confounders were adjusted for and why they were included | 9  |
| 2  |                          |    | (b) Report category boundaries when continuous variables were categorized                                                                                                                                    |    |
| 3  |                          |    | (c) If relevant, consider translating estimates of relative risk into absolute risk for a meaningful time period                                                                                             |    |
| 4  |                          |    |                                                                                                                                                                                                              |    |
| 5  |                          |    |                                                                                                                                                                                                              |    |
| 6  |                          |    |                                                                                                                                                                                                              |    |
| 7  |                          |    |                                                                                                                                                                                                              |    |
| 8  |                          |    |                                                                                                                                                                                                              |    |
| 9  | Other analyses           | 17 | Report other analyses done—eg analyses of subgroups and interactions, and sensitivity analyses                                                                                                               | 9  |
| 10 |                          |    |                                                                                                                                                                                                              |    |
| 11 | <b>Discussion</b>        |    |                                                                                                                                                                                                              |    |
| 12 |                          |    |                                                                                                                                                                                                              |    |
| 13 | Key results              | 18 | Summarise key results with reference to study objectives                                                                                                                                                     | 9  |
| 14 | Limitations              | 19 | Discuss limitations of the study, taking into account sources of potential bias or imprecision. Discuss both direction and magnitude of any potential bias                                                   | 10 |
| 15 |                          |    |                                                                                                                                                                                                              |    |
| 16 | Interpretation           | 20 | Give a cautious overall interpretation of results considering objectives, limitations, multiplicity of analyses, results from similar studies, and other relevant evidence                                   | 10 |
| 17 |                          |    |                                                                                                                                                                                                              |    |
| 18 |                          |    |                                                                                                                                                                                                              |    |
| 19 | Generalisability         | 21 | Discuss the generalisability (external validity) of the study results                                                                                                                                        | 11 |
| 20 |                          |    |                                                                                                                                                                                                              |    |
| 21 | <b>Other information</b> |    |                                                                                                                                                                                                              |    |
| 22 | Funding                  | 22 | Give the source of funding and the role of the funders for the present study and, if applicable, for the original study on which the present article is based                                                | 12 |
| 23 |                          |    |                                                                                                                                                                                                              |    |
| 24 |                          |    |                                                                                                                                                                                                              |    |

\*Give information separately for exposed and unexposed groups.

**Note:** An Explanation and Elaboration article discusses each checklist item and gives methodological background and published examples of transparent reporting. The STROBE checklist is best used in conjunction with this article (freely available on the Web sites of PLoS Medicine at <http://www.plosmedicine.org/>, Annals of Internal Medicine at <http://www.annals.org/>, and Epidemiology at <http://www.epidem.com/>). Information on the STROBE Initiative is available at <http://www.strobe-statement.org>.

# BMJ Open

## Epidemiology and risk factors for diabetes in the suburbs of Beijing: a retrospective cohort study

|                                 |                                                                                                                                                                                           |
|---------------------------------|-------------------------------------------------------------------------------------------------------------------------------------------------------------------------------------------|
| Journal:                        | <i>BMJ Open</i>                                                                                                                                                                           |
| Manuscript ID                   | bmjopen-2020-041526.R1                                                                                                                                                                    |
| Article Type:                   | Original research                                                                                                                                                                         |
| Date Submitted by the Author:   | 15-Oct-2020                                                                                                                                                                               |
| Complete List of Authors:       | Xie, Lingding; China-Japan Friendship Hospital<br>Zhao, Xu; Civil Aviation General Hospital<br>Zhang, Bo; China-Japan Friendship Hospital,<br>Zhu, Haiqing; China Meitan General Hospital |
| <b>Primary Subject Heading</b>: | Epidemiology                                                                                                                                                                              |
| Secondary Subject Heading:      | Diabetes and endocrinology                                                                                                                                                                |
| Keywords:                       | General diabetes < DIABETES & ENDOCRINOLOGY, EPIDEMIOLOGY, PUBLIC HEALTH                                                                                                                  |
|                                 |                                                                                                                                                                                           |

SCHOLARONE™  
Manuscripts



I, the Submitting Author has the right to grant and does grant on behalf of all authors of the Work (as defined in the below author licence), an exclusive licence and/or a non-exclusive licence for contributions from authors who are: i) UK Crown employees; ii) where BMJ has agreed a CC-BY licence shall apply, and/or iii) in accordance with the terms applicable for US Federal Government officers or employees acting as part of their official duties; on a worldwide, perpetual, irrevocable, royalty-free basis to BMJ Publishing Group Ltd ("BMJ") its licensees and where the relevant Journal is co-owned by BMJ to the co-owners of the Journal, to publish the Work in this journal and any other BMJ products and to exploit all rights, as set out in our [licence](#).

The Submitting Author accepts and understands that any supply made under these terms is made by BMJ to the Submitting Author unless you are acting as an employee on behalf of your employer or a postgraduate student of an affiliated institution which is paying any applicable article publishing charge ("APC") for Open Access articles. Where the Submitting Author wishes to make the Work available on an Open Access basis (and intends to pay the relevant APC), the terms of reuse of such Open Access shall be governed by a Creative Commons licence – details of these licences and which [Creative Commons](#) licence will apply to this Work are set out in our licence referred to above.

Other than as permitted in any relevant BMJ Author's Self Archiving Policies, I confirm this Work has not been accepted for publication elsewhere, is not being considered for publication elsewhere and does not duplicate material already published. I confirm all authors consent to publication of this Work and authorise the granting of this licence.

1  
2  
3  
4 **1. Epidemiology and risk factors for diabetes in the suburbs of**  
5  
6  
7 **2 Beijing: a retrospective cohort study**  
8  
9

10 3

11  
12 4 Lingding Xie\*,<sup>1</sup> Xu Zhao\*,<sup>2</sup> Bo Zhang,<sup>1</sup> Haiqing Zhu <sup>3</sup>  
13  
14 5

15  
16 **6 Author Affiliations**  
17  
18

19  
20 7 <sup>1</sup>Endocrinology Department, China-Japan Friendship Hospital, Beijing/100029, China  
21

22 8 <sup>2</sup>Endocrinology Department, Civil Aviation General Hospital, Beijing/100123, China  
23

24 9 <sup>3</sup> Endocrinology Department, China Meitan General Hospital, Beijing/100028, China  
25  
26  
27

28 10

29  
30  
31 \* These authors contributed equally to this work and should be regarded as co-first  
32  
33 authors  
34  
35

36 13

37  
38 **14 Correspondence**  
39

40 15 Bo Zhang, MD., Ph.D.  
41

42 16 Department of Endocrinology,  
43

44 17 China-Japan Friendship Hospital,  
45

46 18 No. 2 Yinghua East Street, Chaoyang District,  
47

48 19 Beijing 100029, P.R. China  
49

50 20 Phone: +86-10-84205254  
51

52 21 Fax: +86-10-84205664  
53

54 22 E-mail address: [drbozhang@yahoo.com](mailto:drbozhang@yahoo.com)  
55  
56  
57  
58  
59  
60

1  
2  
3  
4 24 **Abstract**

5 25 **Objective** We aimed to detect the incidence and risk factors of type 2 diabetes  
6 mellitus (T2DM) development in the suburbs of Beijing.  
7  
8

9 26  
10 27 **Design** Cohort study with record linkage to incidence data.

11 28 **Setting** We performed a 5-year follow-up study in a randomly selected suburban  
12 population including 1,114 subjects aged  $\geq 18$  years living in the suburbs of Beijing.  
13  
14

15 29  
16 30 **Participants** 118 subjects with T2DM at baseline according to the 1999 WHO criteria  
17 were excluded, and 895 subjects attended the follow-up assessment in 2012. The non-  
18 diabetic subjects at baseline were classified into two groups: normal glucose tolerance  
19 (NGT) group (n=673) and impaired glucose regulation (IGR) group (n=222). The  
20 incidence and risk factors of diabetes development in each group were investigated.  
21  
22  
23  
24

25 31  
26 32 **Outcome measures** A structured questionnaire about sociodemographic  
27 characteristics, height, weight, waist circumference, hip circumference, blood  
28 pressure, oral glucose tolerance test, and serum lipid levels.  
29  
30  
31

32 32  
33 33 **Results** Out of the 895 non-diabetic subjects, 67 developed diabetes with 29 in the  
34 NGT group and 38 in the IGR group respectively after a 5-year follow-up, producing  
35 an overall 5-year cumulative incidence of diabetes of 13%. The incidence of diabetes  
36 was 15.5 cases per 1000 person-years, 8.9 cases per 1000 person-years in the NGT  
37 group and 35.7 cases per 1000 person-years in the IGR group ( $P < 0.01$ ;  $RR = 4.03$ ;  
38 95%  $CI: 2.58-9.29$ ). Binary logistic regression analysis showed that the risk factors for  
39 diabetes development included fasting plasma glucose (FPG) in the NGT group, and  
40 sex, the waist-to-hip ratio (WHR), FPG and diastolic blood pressure (DBP) in the IGR  
41 group.  
42  
43  
44  
45  
46  
47  
48  
49

50 46  
51 47 **Conclusions:** During a mean follow-up of 5.0 years, the incidence of T2DM in the  
52 suburbs of Beijing was 15.5 per 1000 person-years. Early prevention of diabetes  
53 should focus on IGR subjects. Elevated FPG predicted diabetes development for both  
54 NGT and IGR subjects. Female sex, overweight/obesity and DBP are risk factors for  
55 diabetes development in IGR subjects.  
56  
57  
58  
59  
60

1  
2  
3  
4 52  
5  
6 53  
7  
8 54  
9  
10 55  
11  
12 56  
13  
14 57  
15  
16 58  
17  
18 59  
19  
20 60  
21  
22 61  
23  
24 62  
25  
26 63  
27  
28 64  
29  
30  
31  
32  
33  
34  
35  
36  
37  
38  
39  
40  
41  
42  
43  
44  
45  
46  
47  
48  
49  
50  
51  
52  
53  
54  
55  
56  
57  
58  
59  
60

### **Strengths and limitations of this study**

- Provides new data on the incidence of T2DM in the Beijing area.
- Has a longitudinal design.
- Selects a cohort by multiple-stage sampling at baseline.
- Has a relatively long follow-up period.
- Has the limitation that many variables assessed as risk factors were not updated regularly, and the data were collected only at the baseline investigation and at the end of the study.

view only

65

**66 Introduction**

67 Diabetes mellitus is a clinical syndrome characterized by disordered  
68 glycometabolism. The lack and/or insufficiency of insulin induces metabolic disorders  
69 related to saccharides, lipids, proteins, water and electrolytes, resulting in  
70 hyperglycemia as the main clinical feature. Long-term hyperglycemia leads to  
71 macrovascular and microvascular complications, which may result in disability and  
72 death.<sup>1,2</sup> Diabetes is increasingly prevalent, affecting 463 million (9.3%) adults  
73 worldwide, and these figures are expected to increase to 700 million (10.9%) by  
74 2045.<sup>3</sup> Type 2 diabetes mellitus (T2DM) accounts for over 90% of diabetes cases.  
75 Diabetes, as a leading cause of death,<sup>1,3,4</sup> is becoming a public issue, placing a heavy  
76 burden on the health care system.<sup>5</sup> In 2017 approximately 5 million adult deaths  
77 worldwide were attributed to diabetes,<sup>6</sup> and the global healthcare expenditure  
78 associated with people with diabetes in 2019 was estimated to be USD 760 billion.<sup>7</sup>  
79 Because T2DM is usually asymptomatic, it can remain undiagnosed for many years.  
80 Almost half of all people (50.1%) living with diabetes were undiagnosed in 2019.<sup>3</sup>  
81 Accordingly, screening for prediabetes/T2DM and preventing the evolution of  
82 diabetes in individuals with risk factors are essential. Currently, the risk factors  
83 related to T2DM development may include age, the body mass index (BMI), body fat  
84 distribution, a family history of diabetes, a history of cardiovascular disease (CVD), a  
85 history of gestational diabetes mellitus (GDM), race/ethnicity, diet, physical  
86 inactivity, hypertension, dyslipidemia and prediabetes.<sup>4,8-16</sup> Some studies have  
87 demonstrated that birth weight,<sup>17,18</sup> income,<sup>19</sup> socioeconomic status,<sup>20,21</sup> working  
88 hours,<sup>21,22</sup> occupation<sup>23</sup> and genetic factors<sup>24-26</sup> might also contribute to T2DM  
89 development .  
90 In addition to the process of urbanization, the population aging, changes in lifestyle,  
91 and increasing prevalence of obesity and overweight, the prevalence of diabetes in  
92 China has increased over the past three decades. The prevalence of diabetes in China



1  
2  
3  
4 93 was 0.67% in 1980,<sup>27</sup> 2.12% in 1995,<sup>28</sup> 5.5% in 2001,<sup>29</sup> 9.7% in 2008,<sup>30</sup> 9.7% in  
5  
6 94 2010<sup>31</sup> and 10.4% in 2013.<sup>32</sup> As the capital city, limited information is available  
7  
8 95 regarding the incidence of diabetes and prediabetes in Beijing. Certain studies have  
9  
10 96 suggested that different diabetic risk patterns might exist in Asian populations.<sup>33-36</sup>  
11  
12 97 This study aimed to determine the incidence of and risk factors for T2DM among  
13  
14 98 Chinese adults in the suburbs of Beijing.

## 99 **Materials and Methods**

### 100 **Study population**

101 The study population comprised residents living in the suburbs (Huairou, Pinggu and  
102 Hepingli) of Beijing. The three suburbs were randomly selected from the Beijing  
103 countryside. Individuals aged 18 years or older who were willing to participate and  
104 provided informed consent were eligible to participate in the study. People with a  
105 history of diabetes were excluded from the study. Pregnant women were also  
106 excluded from the study.

107 We performed a 5-year perspective cohort study. The baseline survey occurred from  
108 June 2007 to September 2008 using a random sampling method with a follow-up  
109 examination from May to July 2012. All the subjects were asked to undergo a  
110 personal interview, physical examination and blood test [including an oral glucose  
111 tolerance test (OGTT)]. Through OGTT, subjects with diabetes at baseline were  
112 excluded, and the nondiabetic subjects at baseline were divided into the normal  
113 glucose tolerance (NGT) group and impaired glucose regulation (IGR) group. We  
114 analyzed the incidence and risk factors of diabetes development in each group.  
115 Diabetes mellitus was defined according to the 1990 WHO criteria or self-reported  
116 prior diagnosis of diabetes with current medication use. IGR was determined if the  
117 subjects had a fasting plasma glucose (FPG) level of 6.1–6.9 mmol/L and/or a 2-hour  
118 plasma glucose level of 7.8–11.0 mmol/L.

### 119 **Data collection**

1  
2  
3  
4 120 **Sociodemographic characteristics**—The data were collected by trained staff using a  
5  
6 121 structured questionnaire via a face-to-face interview to assess general information  
7  
8 122 (sex, age, nationality, education status, occupation, and per capita income), personal  
9  
10 123 history (smoking history, alcohol history, physical activity, and dietary habits), family  
11  
12 124 history (diabetes mellitus, hypertension, hyperlipidemia, myocardial infarction,  
13  
14 125 stroke, and obesity), and history of current illness (diabetes, hypertension,  
15  
16 126 hyperlipidemia, cardiovascular, cerebrovascular diseases, and kidney diseases).  
17  
18 127 Subjects who were diagnosed with T2DM between recruitment and the end of follow-  
19  
20 128 up were asked to report the date of diagnosis.

21  
22 129 **Anthropometric measurements** — The subjects were examined for height, weight,  
23  
24 130 waist circumference (WC), hip circumference (HC) and blood pressure. All the  
25  
26 131 subjects were asked to remove their shoes, socks, hats and coats, stand erectly and  
27  
28 132 look forward with their arms relaxed and their heels together. Height was measured in  
29  
30 133 centimeters using a height bar, and weight was measured in kilograms using a digital  
31  
32 134 weighing scale. The WC is the circumference of the waist at the horizontal line of the  
33  
34 135 umbilicus measured in centimeters using a measuring tape, and the HC is the  
35  
36 136 circumference of hips at the horizontal line of the anterior superior spine measured in  
37  
38 137 centimeters using a measuring tape. The BMI was calculated as weight in kilograms  
39  
40 138 divided by the square of height in meters ( $\text{kg}/\text{m}^2$ ), while the waist-to-hip ratio (WHR)  
41  
42 139 was calculated as WC (cm) divided by HC (cm). The blood pressure values used were  
43  
44 140 an average of three measurements, which were measured 2 min apart using a mercury  
45  
46 141 sphygmomanometer. The subjects were asked to stop smoking and consuming alcohol  
47  
48 142 the day before the examination and to sit quietly in a chair for at least 5 minutes  
49  
50 143 before the measurement with their arms bare and placed at the chest level. All the  
51  
52 144 clinical staff members were trained to measure blood pressure and obtain  
53  
54 145 anthropometric measurements.

55  
56 146 **Laboratory examination** — All the subjects were invited to undergo a blood test  
57  
58 147 (including an OGTT) at the baseline and the end of follow-up. Venous blood samples  
59  
60

1  
2  
3  
4 148 after 8–14 hours of fasting were obtained from the subjects to measure FPG, total  
5  
6 149 cholesterol (TC), triglycerides (TGs), high-density lipoprotein cholesterol (HDL-C)  
7  
8 150 and low-density lipoprotein cholesterol (LDL-C). Venous blood samples, after a 75 g  
9  
10 151 oral glucose load, were obtained to measure the 2-hour plasma glucose (PG2h). The  
11  
12 152 subjects were instructed to maintain normal physical activity without dietary limit (the  
13  
14 153 intake of saccharides should be no less than 150 g per day) before proceeding with the  
15  
16 154 OGTT.

### 17 18 155 **Statistical analysis**

19  
20 156 We used the P-P plot to test the normality of the numerical variables. The differences  
21  
22 157 in continuous and categorical variables between the NGT and IGR groups were  
23  
24 158 examined using t test and the  $\chi^2$  test statistic, respectively. Kaplan–Meier survival  
25  
26 159 estimates were used to calculate the 5-year cumulative incidence of T2DM. The log-  
27  
28 160 rank test was used to compare the survival curves. The Mantel–Haenszel  $\chi^2$  test of  
29  
30 161 trends was used to analyze the ordinal data. Binary logistic regression analyses were  
31  
32 162 used to estimate the odds ratio and 95% confidence interval for diabetes development.  
33  
34 163 All the analyses were performed using SPSS statistical software version 17.0, and a P  
35  
36 164 value < 0.05 was considered statistically significant.

### 37 38 165 **Patient and Public Involvement**

39  
40 166 Patients or the public were not involved in the design, or conduct, or reporting, or  
41  
42 167 dissemination plans of our research.

### 43 44 168 **Results**

#### 45 46 169 **Characteristics of the study population at baseline**

47  
48 170 In total, 1,114 residents participated in the study, and 1,014 subjects completed the  
49  
50 171 follow-up, with an overall response rate of 91.0%. After eliminating 118 subjects who  
51  
52 172 were diagnosed with diabetes at baseline and one subject with severe data deficiency,  
53  
54 173 895 subjects (308 men and 587 women) with a mean age of  $48.1 \pm 11.9$  years were  
55  
56 174 included in the analysis, with 673 in the NGT group and 222 in the IGR group. The  
57  
58 175 baseline characteristics of the 895 subjects in the study are shown in Table 1.  
59  
60

1  
2  
3  
4 176 Continuous variables were expressed as means±standard deviation (sd) and were  
5  
6 177 examined using a t test, while categorical variables were expressed as percentages and  
7  
8 178 were examined using the  $\chi^2$  test. No significant difference was found between the  
9  
10 179 NGT group and the IGR group in sex, height, family history of T2DM, smoking  
11  
12 180 history, alcohol history, exercise time, diastolic blood pressure (DBP) or HDL-C.  
13  
14 181 Age, weight, BMI, WC, WHR, systolic blood pressure (SBP), FPG, PG2h, TGs, TC  
15  
16 182 and LDL-C in the IGR group were significantly higher than those in the NGT group.

### 183 **Incidence of T2DM**

184 During the follow-up, T2DM developed in 67 subjects, 29 in the NGT group and 38  
185 in the IGR group, resulting in T2DM onset rates of 15.45, 8.86 and 35.67 per 1,000  
186 person-years in the total study population, NGT group and IGR group, respectively  
187 (Table 2). The difference in the incidence of T2DM between the NGT group and IGR  
188 group was statistically significant ( $\chi^2=37.38$ ;  $P<0.01$ ;  $RR=4.03$ ; 95% CI: 2.58-9.29).  
189 The 5-year cumulative incidence of T2DM was 13%, with 10% in the NGT group and  
190 20% in the IGR group. The mean follow-up duration was 5.008 years (SE=0.013;  
191 95% CI: 4.982–5.033), with 5.003 years (SE=0.012; 95% CI: 5.010–5.056) in the  
192 NGT group and 4.933 years (SE=0.038; 95% CI: 4.859–5.007) in the IGR group.  
193 Using the log-rank test, we found that the cumulative incidence of T2DM in the IGR  
194 group was significantly higher than that in the NGT group ( $\chi^2=36.905$ ;  $P<0.0001$ ).  
195 The results of the Kaplan–Meier survival analyses are shown in Figure 1.

### 196 **Analyses of the risk factors for diabetes development**

197 The results of binary logistic regression analyses for T2DM development in the NGT  
198 and IGR groups are shown in Table 3. FPG contributed to T2DM development in the  
199 NGT group, and the OR was 6.111 (1.379, 27.070;  $P=0.017$ ). Sex, WHR, DBP, and  
200 FPB contributed to T2DM development in the IGR group, and the ORs were 7.293  
201 (1.074, 49.549;  $P=0.042$ ), 2.874E8 (8.386, 9.847E15;  $P=0.028$ ), 1.068 (1.009, 1.130;  
202  $P=0.024$ ) and 7.243 (2.314, 22.673;  $P=0.001$ ), respectively. The increase in exercise

1  
2  
3  
4 203 time slightly decreased the risk of T2DM in the IGR group, with an OR of 0.923  
5  
6 204 (0.847, 1.005; P=0.066).

## 7 205 **Discussion**

8  
9 206 The prevalence of diabetes mellitus has been increasing markedly in recent decades.  
10  
11 207 Among adults aged 20–79 years in 2019, there were an estimated 463 million cases of  
12  
13 208 diabetes<sup>3</sup>. However, the striking prevalence may be partly attributable to the increase  
14  
15 209 in population and prolongation of the life-span.<sup>37</sup> Accordingly, we studied the  
16  
17 210 growing trend of T2DM by investigating the cumulative incidence of T2DM. Our  
18  
19 211 results showed that 15.45 new cases of diabetes per 1,000 people-years were  
20  
21 212 diagnosed during the five-year observation period (2007–2012). This marked trend is  
22  
23 213 consistent with diabetes incidence rates worldwide, such as those described in the  
24  
25 214 ATTICA study in Greece (12.9 cases per 1,000 person-years from 2002 to 2012)<sup>38</sup>  
26  
27 215 and those described in a study conducted in Mexico (12.7 cases per 1,000 person-  
28  
29 216 years from 1990 to 2008).<sup>39</sup> The incidence rate found in our study is lower than that in  
30  
31 217 a study of Pima Indians (23.5 cases per 1,000 person-years during 1991 to 2003)<sup>40</sup> and  
32  
33 218 in a study conducted in northern Spain (95.2 cases per 1,000 person-years during  
34  
35 219 1998 to 2005)<sup>41</sup> and is higher than that observed in a study conducted in Iran (10.6  
36  
37 220 cases per 1000 person-years from 1999 to 2011)<sup>42</sup> and in the SUPREME-DM project  
38  
39 221 in the USA (11.5 cases per 1000 person-years from 2006 to 2011).<sup>43</sup> The T2DM  
40  
41 222 incidence in the suburbs of Beijing is higher than that identified in the investigation  
42  
43 223 conducted by Wang C et al in a Chinese population in 2010 (9.5 cases per 1000  
44  
45 224 person-years in men and 9.2 in women).<sup>44</sup> This difference may partly be due to the  
46  
47 225 relatively higher standard of living in the suburbs of Beijing.  
48  
49 226 Diabetes development is based on the interaction between genes and lifestyle and  
50  
51 227 environmental factors.<sup>45,46</sup> Compared with the NGT group that had an incidence of  
52  
53 228 8.86 cases per 1,000 person-years, the IGR group (35.67 cases per 1,000 person-  
54  
55 229 years) had a higher incidence rate (RR=4.03;95% CI: 2.58–9.29;P<0.01). In our  
56  
57 230 study, diabetes development was mainly the consequence of elevated FPG in the NGT  
58  
59  
60

1  
2  
3  
4 231 group. Diabetes development was mainly associated with sex (female), abnormal  
5  
6 232 WHR, elevated DBP and elevated FPG in the IGR group. The increase in the FPG  
7  
8 233 level was a strong predictor of diabetes development in both the NGT group and IGR  
9  
10 234 group, with 6.111- and 7.243-fold increased risk per unit increase, respectively.  
11  
12 235 In our study, the WHR measurement was found to predict diabetes risk. Some studies  
13  
14 236 have declared that WHR, as an obesity indicator, is superior to BMI and WC.<sup>47,48</sup> A  
15  
16 237 meta-analysis demonstrated that either BMI or WC (WHR) predicted or was  
17  
18 238 independently associated with type 2 diabetes, regardless of the controversial findings  
19  
20 239 regarding which was better.<sup>49</sup>  
21  
22 240 Age and family history of diabetes are considered risk factors for diabetes  
23  
24 241 development.<sup>4,8-16</sup> However, we found only an increasing trend of diabetes  
25  
26 242 development in the elderly population and subjects with a family history of diabetes  
27  
28 243 ( $P > 0.05$ ). This finding might be related to the short period of follow-up and the  
29  
30 244 subjects' unawareness of their family history of diabetes.  
31  
32 245 There is evidence that T2DM can be prevented in high-risk individuals by a lifestyle  
33  
34 246 program of regular exercise.<sup>50,51</sup> Surprisingly, our study found that exercise did not  
35  
36 247 exert a beneficial effect on diabetes incidence, a finding similar to that in the ATTICA  
37  
38 248 study.<sup>38,52</sup> However, we found a decreasing trend in the diabetes incidence with  
39  
40 249 increasing exercise time. The increase in exercise time slightly decreased the risk of  
41  
42 250 T2DM in the IGR group, with an OR of 0.923 (0.847, 1.005;  $P = 0.066$ ).  
43  
44 251 The strength of our study is that it was based on a cohort selected by multiple stage  
45  
46 252 sampling at baseline with a relatively long follow-up period. A limitation is that many  
47  
48 253 variables assessed as risk factors were not updated regularly, and might have changed  
49  
50 254 during the follow-up period. Additionally, the data were collected only at the baseline  
51  
52 255 investigation and at the end of the study.  
53  
54 256 **Conclusions**  
55  
56 257 During a mean follow-up of 5.0 years, the incidence of T2DM in the suburbs of  
57  
58 258 Beijing was 15.45 cases per 1000 person-years, which was relatively higher than that  
59  
60

1  
2  
3  
4 259 in many other areas worldwide. Compared with the NGT subjects, the IGR subjects  
5  
6 260 were more susceptible to T2DM. To prevent diabetes development, all the subjects  
7  
8 261 should be evaluated for elevated FPG. Additionally, sex, WHR, and DBP were  
9  
10 262 predictors of T2DM in IGR subjects.

11 263 The findings in this study provide new data on the incidence of T2DM in the Beijing  
12  
13 264 area. The predictors of T2DM reported in the present study may be conducive to  
14  
15 265 formulating a protocol for diabetes prevention.

### 18 19 266 **Authors' contributions**

20  
21  
22  
23 267 Conceptualization, B.Z.; Data curation, H.Z.; Formal analysis, H.Z.; Investigation,  
24  
25 268 L.X. and X.Z.; Methodology, B.Z.; Project administration, L.X., X.Z. and B.Z.;  
26  
27  
28 269 Writing – original draft, L.X. and X.Z.; Writing – review & editing, B.Z.. All authors  
29  
30 270 read and approved the final manuscript, as well as the submission of this work. B.Z.  
31  
32 271 supervised and managed the data. B.Z. is the guarantor of this work.

33  
34  
35 272

### 36 37 38 273 **Conflicts of interest**

39  
40 274 The authors declare that they have no conflicts of interest.

41  
42 275

43  
44  
45 276 **Competing interests** None declared.

46  
47  
48 277

### 49 50 278 **Funding statement**

51 279 The study was supported by grants from the 11th Five-year National Science and  
52  
53 280 Technology Support Program (2009BAI80B04).

54  
55 281

### 56 57 282 **Ethics approval**

58  
59 283 Ethical approval was obtained from the Ethics Committee of Clinical Trials of  
60

1  
2  
3  
4  
5  
6  
7  
8  
9  
10  
11  
12  
13  
14  
15  
16  
17  
18  
19  
20  
21  
22  
23  
24  
25  
26  
27  
28  
29  
30  
31  
32  
33  
34  
35  
36  
37  
38  
39  
40  
41  
42  
43  
44  
45  
46  
47  
48  
49  
50  
51  
52  
53  
54  
55  
56  
57  
58  
59  
60

284 Drugs/Devices in China-Japan Friendship Hospital (2011-049).

285

286 **Data availability statement**

287 All data included in this study are available from the corresponding author on  
288 reasonable request.

289

For peer review only



291 **Table 1 Comparison of the characteristics of the NGT and IGR subjects at**  
 292 **baseline**

| Variable at baseline         | NGT group<br>(n=673) | IGR group<br>(n=222) | t or $\chi^2$ , <i>P</i> value |
|------------------------------|----------------------|----------------------|--------------------------------|
| Sex(%male)                   | 34.9                 | 32.9                 | 0.306, 0.625                   |
| Age (years)                  | 46.75±11.57          | 52.01±12.03          | -5.813, <0.001                 |
| Height (cm)                  | 161.85±7.94          | 161.18±7.83          | 1.092, 0.275                   |
| Weight (kg)                  | 64.32±10.75          | 67.49±11.05          | -3.777, <0.001                 |
| BMI (kg/m <sup>2</sup> )     | 24.52±3.40           | 25.93±3.50           | -5.332, <0.001                 |
| WC (cm)                      | 83.04±9.75           | 86.82±9.20           | -5.075, <0.001                 |
| WHR                          | 0.87±0.07            | 0.89±0.06            | -3.495, <0.001                 |
| SBP (mmHg)                   | 119.71±18.37         | 125.18±20.13         | -3.582, <0.001                 |
| DBP (mmHg)                   | 78.02±11.21          | 79.75±12.66          | -1.843, 0.066                  |
| FPG (mmol/L)                 | 5.25±0.42            | 5.82±0.61            | -15.875, <0.001                |
| PG2h (mmol/L)                | 5.90±1.01            | 8.29±1.52            | -26.692, <0.001                |
| TGs (mmol/L)                 | 1.42±1.17            | 1.61±1.08            | -2.165, 0.031                  |
| TC (mmol/L)                  | 4.56±0.92            | 4.84±0.95            | -3.865, <0.001                 |
| HDL-C (mmol/L)               | 1.35±0.34            | 1.34±0.36            | 0.464, 0.643                   |
| LDL-C (mmol/L)               | 2.77±0.77            | 3.08±0.81            | -4.648, <0.001                 |
| Exercise duration<br>(hours) | 5.85±11.81           | 5.59±8.06            | 0.305, 0.761                   |
| FH of T2DM (%)               | 15.5                 | 21.4                 | 3.722, 0.068                   |
| Smoking history (%)          | 22.4                 | 20.7                 | 0.286, 0.641                   |
| Alcohol history (%)          | 27.9                 | 28.8                 | 0.076, 0.796                   |
| Years of follow-up<br>(year) | 4.85±0.32            | 4.79±0.56            | 2.081, 0.038                   |

293 BMI, body mass index; WC, waist circumference; WHR, waist-to-hip ratio; SBP,  
 294 systolic blood pressure; DBP, diastolic blood pressure; FPG, fasting plasma glucose;

1  
2  
3  
4  
5  
6  
7  
8  
9  
10  
11  
12  
13  
14  
15  
16  
17  
18  
19  
20  
21  
22  
23  
24  
25  
26  
27  
28  
29  
30  
31  
32  
33  
34  
35  
36  
37  
38  
39  
40  
41  
42  
43  
44  
45  
46  
47  
48  
49  
50  
51  
52  
53  
54  
55  
56  
57  
58  
59  
60

295 PG2h, 2-hour plasma glucose; TC, total cholesterol; TGs, triglycerides; HDL-C, high-  
296 density lipoprotein cholesterol; LDL-C, low-density lipoprotein cholesterol; FH,  
297 family history. Exercise duration is expressed as hours per week.  
298

For peer review only

299 **Table 2. Incidence of T2DM during the follow-up**

|           | Cases of diabetes | Follow-up (person-<br>years) | Incidence (per 1,000<br>person-years) |
|-----------|-------------------|------------------------------|---------------------------------------|
| NGT group | 29                | 3,271.5                      | 8.86                                  |
| IGR group | 38                | 1,065.3                      | 35.67                                 |
| Total     | 67                | 4,336.8                      | 15.45                                 |

300

301

302 **Table 3. Multivariate logistic regression model for T2DM development**

|                           | NGT group               |                | IGR group                 |                |
|---------------------------|-------------------------|----------------|---------------------------|----------------|
|                           | OR (95% CI)             | <i>P</i> value | OR (95% CI)               | <i>P</i> value |
| Sex                       | 0.375 (0.067, 2.103)    | 0.265          | 7.293 (1.074, 49.549)     | 0.042          |
| Age (years)               | 1.013 (0.962, 1.068)    | 0.615          | 1.019 (0.964, 1.077)      | 0.499          |
| Weight (kg)               | 1.044 (0.927, 1.175)    | 0.478          | 1.056 (0.929, 1.200)      | 0.402          |
| BMI (kg/m <sup>2</sup> )  | 0.934 (0.653, 1.336)    | 0.710          | 0.971 (0.661, 1.427)      | 0.881          |
| WC (cm)                   | 1.073 (0.936, 1.230)    | 0.311          | 0.904 (0.748, 1.092)      | 0.295          |
| WHR                       | 0.006 (0.000, 7058.081) | 0.473          | 2.874E8 (8.386, 9.847E15) | 0.028          |
| SBP (mmHg)                | 1.013 (0.976, 1.052)    | 0.492          | 0.992 (0.958, 1.026)      | 0.637          |
| DBP (mmHg)                | 0.955 (0.890, 1.024)    | 0.198          | 1.068 (1.009, 1.130)      | 0.024          |
| FPG (mmol/L)              | 6.111 (1.379, 27.070)   | 0.017          | 7.243 (2.314, 22.673)     | 0.001          |
| TC (mmol/L)               | 2.719 (0.917, 8.067)    | 0.071          | 0.814 (0.141, 4.699)      | 0.818          |
| TGs (mmol/L)              | 0.996 (0.589, 1.684)    | 0.989          | 0.926 (0.491, 1.749)      | 0.813          |
| HDL-C (mmol/L)            | 2.536 (0.519, 12.395)   | 0.250          | 0.622 (0.071, 5.460)      | 0.669          |
| LDL-C (mmol/L)            | 0.604 (0.206, 1.769)    | 0.358          | 1.070 (0.181, 6.321)      | 0.941          |
| Exercise duration (hours) | 1.013 (0.947, 1.084)    | 0.707          | 0.923 (0.847, 1.005)      | 0.066          |
| FH of T2DM                | 1.868 (0.492, 7.090)    | 0.358          | 2.062 (0.656, 6.478)      | 0.215          |
| Smoking history           | 0.766 (0.186, 3.162)    | 0.713          | 1.591 (0.346, 7.317)      | 0.551          |
| Alcohol history           | 0.726 (0.202, 2.610)    | 0.624          | 1.685 (0.458, 6.203)      | 0.432          |

303 BMI, body mass index; WC, waist circumference; WHR, waist-to-hip ratio; SBP,  
304 systolic blood pressure; DBP, diastolic blood pressure; FPG, fasting plasma glucose;  
305 TC, total cholesterol; TGs, triglycerides; HDL-C, high-density lipoprotein cholesterol;  
306 LDL-C, low-density lipoprotein cholesterol; FH, family history. Sex is defined as  
307 male (n=1) or female (n=2), FH of T2DM is defined as no (n=1) or yes (n=2),

1  
2  
3  
4 308 smoking history was defined as no (n=1) or yes (n=2), and alcohol history was  
5  
6 309 defined as no (n=1) or yes (n=2). Exercise duration is expressed as hours per week.  
7  
8 310  
9 311  
10  
11 312  
12  
13  
14  
15  
16  
17  
18  
19  
20  
21  
22  
23  
24  
25  
26  
27  
28  
29  
30  
31  
32  
33  
34  
35  
36  
37  
38  
39  
40  
41  
42  
43  
44  
45  
46  
47  
48  
49  
50  
51  
52  
53  
54  
55  
56  
57  
58  
59  
60

For peer review only

1  
2  
3  
4  
5  
6  
7  
8  
9  
10  
11  
12  
13  
14  
15  
16  
17  
18  
19  
20  
21  
22  
23  
24  
25  
26  
27  
28  
29  
30  
31  
32  
33  
34  
35  
36  
37  
38  
39  
40  
41  
42  
43  
44  
45  
46  
47  
48  
49  
50  
51  
52  
53  
54  
55  
56  
57  
58  
59  
60

313 **Figure legend**

314 Figure 1. Cumulative incidence of T2DM in the NGT and IGR groups (log-rank test:

315  $\chi^2=36.905;P<0.0001$ )

316

317

318

319

320

For peer review only

321 **References**

- 322 1. Mortality GBD, Causes of Death C. Global, regional, and national age-sex specific all-cause and  
323 cause-specific mortality for 240 causes of death, 1990-2013: a systematic analysis for the Global  
324 Burden of Disease Study 2013. *Lancet* 2015;385:117-71.
- 325 2. Wong E, Backholer K, Gearon E, et al. Diabetes and risk of physical disability in adults: a  
326 systematic review and meta-analysis. *Lancet Diabetes Endocrinol* 2013;1:106-14.
- 327 3. Sinclair A, Saeedi P, Kaundal A, Karuranga S, Malanda B, Williams R. Diabetes and global  
328 ageing among 65-99-year-old adults: Findings from the International Diabetes Federation Diabetes  
329 Atlas, 9(th) edition. *Diabetes Res Clin Pract* 2020;162:108078.
- 330 4. Mc Donald Posso AJ, Bradshaw Meza RA, Mendoza Morales EA, Jaen Y, Cumbreira Ortega A,  
331 Mendoza Posada EJ. Diabetes in Panama: Epidemiology, Risk Factors, and Clinical Management. *Ann*  
332 *Glob Health* 2015;81:754-64.
- 333 5. Bommer C, Sagalova V, Heesemann E, et al. Global Economic Burden of Diabetes in Adults:  
334 Projections From 2015 to 2030. *Diabetes Care* 2018;41:963-70.
- 335 6. Cho NH, Shaw JE, Karuranga S, et al. IDF Diabetes Atlas: Global estimates of diabetes  
336 prevalence for 2017 and projections for 2045. *Diabetes Res Clin Pract* 2018;138:271-81.
- 337 7. Williams R, Karuranga S, Malanda B, et al. Global and regional estimates and projections of  
338 diabetes-related health expenditure: Results from the International Diabetes Federation Diabetes Atlas,  
339 9th edition. *Diabetes Res Clin Pract* 2020;162:108072.
- 340 8. Weber MB, Oza-Frank R, Staimez LR, Ali MK, Narayan KM. Type 2 diabetes in Asians:  
341 prevalence, risk factors, and effectiveness of behavioral intervention at individual and population  
342 levels. *Annu Rev Nutr* 2012;32:417-39.
- 343 9. Perez CM, Soto-Salgado M, Suarez E, Guzman M, Ortiz AP. High Prevalence of Diabetes and  
344 Prediabetes and Their Coexistence with Cardiovascular Risk Factors in a Hispanic Community. *J*  
345 *Immigr Minor Health* 2015;17:1002-9.
- 346 10. Aljoudi AS, Taha AZ. Knowledge of diabetes risk factors and preventive measures among  
347 attendees of a primary care center in eastern Saudi Arabia. *Ann Saudi Med* 2009;29:15-9.
- 348 11. American Diabetes A. 2. Classification and Diagnosis of Diabetes: Standards of Medical Care in  
349 Diabetes-2018. *Diabetes Care* 2018;41:S13-S27.
- 350 12. Fletcher B, Gulanic M, Lamendola C. Risk factors for type 2 diabetes mellitus. *J Cardiovasc*  
351 *Nurs* 2002;16:17-23.
- 352 13. Karter AJ, Schillinger D, Adams AS, et al. Elevated rates of diabetes in Pacific Islanders and  
353 Asian subgroups: The Diabetes Study of Northern California (DISTANCE). *Diabetes Care*  
354 2013;36:574-9.
- 355 14. Harjo TC, Perez A, Lopez V, Wong ND. Prevalence of diabetes and cardiovascular risk factors  
356 among California Native American adults compared to other ethnicities: the 2005 California Health  
357 Interview Survey. *Metab Syndr Relat Disord* 2011;9:49-54.
- 358 15. Akter S, Rahman MM, Abe SK, Sultana P. Prevalence of diabetes and prediabetes and their risk  
359 factors among Bangladeshi adults: a nationwide survey. *Bull World Health Organ* 2014;92:204-13,  
360 13A.
- 361 16. Amarasinghe S, Balakumar S, Arasaratnam V. Prevalence and risk factors of diabetes mellitus  
362 among adults in Jaffna District. *Ceylon Med J* 2015;60:107-10.

1  
2  
3  
4  
5  
6  
7  
8  
9  
10  
11  
12  
13  
14  
15  
16  
17  
18  
19  
20  
21  
22  
23  
24  
25  
26  
27  
28  
29  
30  
31  
32  
33  
34  
35  
36  
37  
38  
39  
40  
41  
42  
43  
44  
45  
46  
47  
48  
49  
50  
51  
52  
53  
54  
55  
56  
57  
58  
59  
60

- 363 17. Pettitt DJ, Jovanovic L. Low birth weight as a risk factor for gestational diabetes, diabetes, and  
364 impaired glucose tolerance during pregnancy. *Diabetes Care* 2007;30 Suppl 2:S147-9.
- 365 18. Harder T, Rodekamp E, Schellong K, Dudenhausen JW, Plagemann A. Birth weight and  
366 subsequent risk of type 2 diabetes: a meta-analysis. *Am J Epidemiol* 2007;165:849-57.
- 367 19. Barker L, Crespo R, Gerzoff RB, Denham S, Shrewsbury M, Cornelius-Averhart D. Residence in  
368 a distressed county in Appalachia as a risk factor for diabetes, Behavioral Risk Factor Surveillance  
369 System, 2006-2007. *Prev Chronic Dis* 2010;7:A104.
- 370 20. Espelt A, Arriola L, Borrell C, Larranaga I, Sandin M, Escolar-Pujolar A. Socioeconomic position  
371 and type 2 diabetes mellitus in Europe 1999-2009: a panorama of inequalities. *Curr Diabetes Rev*  
372 2011;7:148-58.
- 373 21. Kivimaki M, Virtanen M, Kawachi I, et al. Long working hours, socioeconomic status, and the  
374 risk of incident type 2 diabetes: a meta-analysis of published and unpublished data from 222 120  
375 individuals. *Lancet Diabetes Endocrinol* 2015;3:27-34.
- 376 22. Bannai A, Yoshioka E, Saijo Y, Sasaki S, Kishi R, Tamakoshi A. The Risk of Developing  
377 Diabetes in Association With Long Working Hours Differs by Shift Work Schedules. *J Epidemiol*  
378 2016;26:481-7.
- 379 23. Honda T, Kuwahara K, Nakagawa T, Yamamoto S, Hayashi T, Mizoue T. Leisure-time,  
380 occupational, and commuting physical activity and risk of type 2 diabetes in Japanese workers: a  
381 cohort study. *BMC Public Health* 2015;15:1004.
- 382 24. Ma RC, Hu C, Tam CH, et al. Genome-wide association study in a Chinese population identifies a  
383 susceptibility locus for type 2 diabetes at 7q32 near PAX4. *Diabetologia* 2013;56:1291-305.
- 384 25. Grarup N, Sandholt CH, Hansen T, Pedersen O. Genetic susceptibility to type 2 diabetes and  
385 obesity: from genome-wide association studies to rare variants and beyond. *Diabetologia*  
386 2014;57:1528-41.
- 387 26. Florez JC, Jablonski KA, Bayley N, et al. TCF7L2 polymorphisms and progression to diabetes in  
388 the Diabetes Prevention Program. *N Engl J Med* 2006;355:241-50.
- 389 27. Guop NDrC. A mass survey of diabetes mellitus in a population of 300,000 in 14 provinces and  
390 municipalities in China (author's transl). *Zhonghua Nei Ke Za Zhi* 1981;20:678-83.
- 391 28. Pan XR, Yang WY, Li GW, Liu J. Prevalence of diabetes and its risk factors in China, 1994.  
392 National Diabetes Prevention and Control Cooperative Group. *Diabetes Care* 1997;20:1664-9.
- 393 29. Chan JC, Malik V, Jia W, et al. Diabetes in Asia: epidemiology, risk factors, and  
394 pathophysiology. *JAMA* 2009;301:2129-40.
- 395 30. Yang W, Lu J, Weng J, et al. Prevalence of diabetes among men and women in China. *N Engl J*  
396 *Med* 2010;362:1090-101.
- 397 31. Xu Y, Wang L, He J, et al. Prevalence and control of diabetes in Chinese adults. *JAMA*  
398 2013;310:948-59.
- 399 32. Wang L, Gao P, Zhang M, et al. Prevalence and Ethnic Pattern of Diabetes and Prediabetes in  
400 China in 2013. *JAMA* 2017;317:2515-23.
- 401 33. Narayan KM, Aviles-Santa L, Oza-Frank R, et al. Report of a National Heart, Lung, And Blood  
402 Institute Workshop: heterogeneity in cardiometabolic risk in Asian Americans In the U.S.  
403 Opportunities for research. *J Am Coll Cardiol* 2010;55:966-73.



- 1  
2  
3 404 34. Oza-Frank R, Ali MK, Vaccarino V, Narayan KM. Asian Americans: diabetes prevalence across  
4 405 U.S. and World Health Organization weight classifications. *Diabetes Care* 2009;32:1644-6.  
5  
6 406 35. Ma RC, Chan JC. Type 2 diabetes in East Asians: similarities and differences with populations in  
7 407 Europe and the United States. *Ann N Y Acad Sci* 2013;1281:64-91.  
8  
9 408 36. Gujral UP, Pradeepa R, Weber MB, Narayan KM, Mohan V. Type 2 diabetes in South Asians:  
10 409 similarities and differences with white Caucasian and other populations. *Ann N Y Acad Sci*  
11 410 2013;1281:51-63.  
12  
13 411 37. Gulland A. Global life expectancy has risen, reports WHO. *BMJ* 2014;348:g3369.  
14 412 38. Koloverou E, Panagiotakos DB, Pitsavos C, et al. 10-year incidence of diabetes and associated  
15 413 risk factors in Greece: the ATTICA study (2002-2012). *Rev Diabet Stud* 2014;11:181-9.  
16 414 39. Gonzalez-Villalpando C, Davila-Cervantes CA, Zamora-Macorra M, Trejo-Valdivia B, Gonzalez-  
17 415 Villalpando ME. Incidence of type 2 diabetes in Mexico: results of the Mexico City Diabetes Study  
18 416 after 18 years of follow-up. *Salud Publica Mex* 2014;56:11-7.  
19 417 40. Pavkov ME, Hanson RL, Knowler WC, Bennett PH, Krakoff J, Nelson RG. Changing patterns of  
20 418 type 2 diabetes incidence among Pima Indians. *Diabetes Care* 2007;30:1758-63.  
21 419 41. Valdes S, Botas P, Delgado E, Alvarez F, Cadorniga FD. Population-based incidence of type 2  
22 420 diabetes in northern Spain: the Asturias Study. *Diabetes Care* 2007;30:2258-63.  
23 421 42. Derakhshan A, Sardarina M, Khalili D, Momenan AA, Azizi F, Hadaegh F. Sex specific  
24 422 incidence rates of type 2 diabetes and its risk factors over 9 years of follow-up: Tehran Lipid and  
25 423 Glucose Study. *PLoS One* 2014;9:e102563.  
26 424 43. Nichols GA, Schroeder EB, Karter AJ, et al. Trends in diabetes incidence among 7 million  
27 425 insured adults, 2006-2011: the SUPREME-DM project. *Am J Epidemiol* 2015;181:32-9.  
28 426 44. Wang C, Li J, Xue H, et al. Type 2 diabetes mellitus incidence in Chinese: contributions of  
29 427 overweight and obesity. *Diabetes Res Clin Pract* 2015;107:424-32.  
30 428 45. Murea M, Ma L, Freedman BI. Genetic and environmental factors associated with type 2 diabetes  
31 429 and diabetic vascular complications. *Rev Diabet Stud* 2012;9:6-22.  
32 430 46. InterAct C, Langenberg C, Sharp S, et al. Design and cohort description of the InterAct Project:  
33 431 an examination of the interaction of genetic and lifestyle factors on the incidence of type 2 diabetes in  
34 432 the EPIC Study. *Diabetologia* 2011;54:2272-82.  
35 433 47. Zhao X, Zhu X, Zhang H, et al. Prevalence of diabetes and predictions of its risks using  
36 434 anthropometric measures in southwest rural areas of China. *BMC Public Health* 2012;12:821.  
37 435 48. Gupta R, Rastogi P, Sarna M, Gupta VP, Sharma SK, Kothari K. Body-mass index, waist-size,  
38 436 waist-hip ratio and cardiovascular risk factors in urban subjects. *J Assoc Physicians India* 2007;55:621-  
39 437 7.  
40 438 49. Qiao Q, Nyamdorj R. Is the association of type II diabetes with waist circumference or waist-to-  
41 439 hip ratio stronger than that with body mass index? *Eur J Clin Nutr* 2010;64:30-4.  
42 440 50. Dela F, Prats C, Helge JW. Exercise interventions to prevent and manage type 2 diabetes:  
43 441 physiological mechanisms. *Med Sport Sci* 2014;60:36-47.  
44 442 51. Teixeira-Lemos E, Nunes S, Teixeira F, Reis F. Regular physical exercise training assists in  
45 443 preventing type 2 diabetes development: focus on its antioxidant and anti-inflammatory properties.  
46 444 *Cardiovasc Diabetol* 2011;10:12.

1  
2  
3  
4  
5  
6  
7  
8  
9  
10  
11  
12  
13  
14  
15  
16  
17  
18  
19  
20  
21  
22  
23  
24  
25  
26  
27  
28  
29  
30  
31  
32  
33  
34  
35  
36  
37  
38  
39  
40  
41  
42  
43  
44  
45  
46  
47  
48  
49  
50  
51  
52  
53  
54  
55  
56  
57  
58  
59  
60

445 52. Panagiotakos DB, Pitsavos C, Skoumas Y, Lentzas Y, Stefanadis C. Five-year incidence of type 2  
446 diabetes mellitus among cardiovascular disease-free Greek adults: findings from the ATTICA study.  
447 *Vasc Health Risk Manag* 2008;4:691-8.  
448

For peer review only

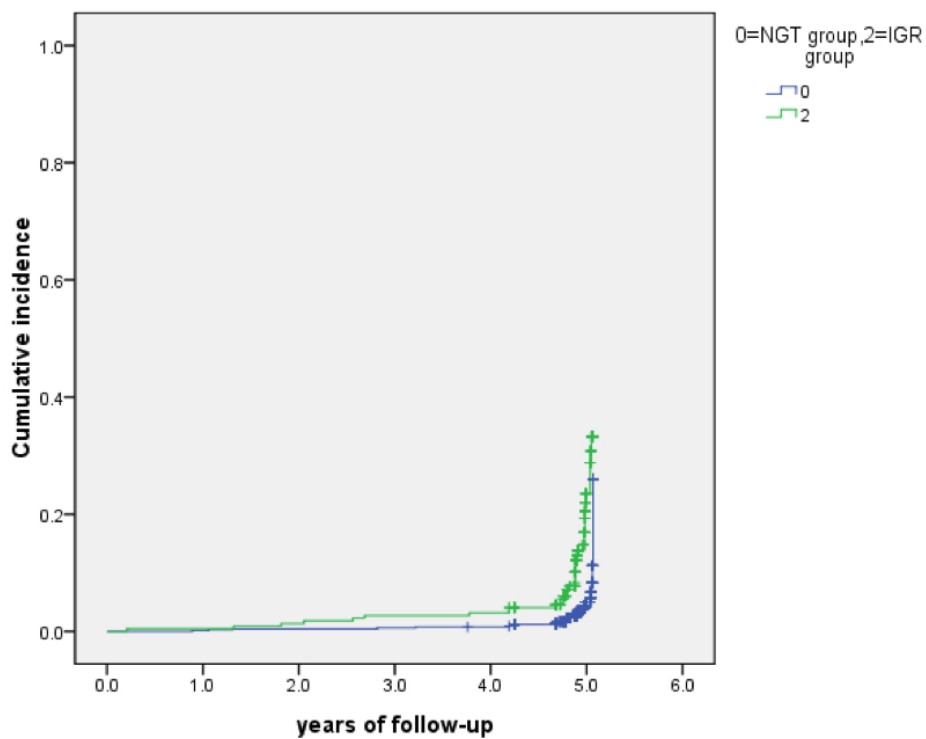

STROBE Statement—Checklist of items that should be included in reports of *cohort studies*

|                           | Item No | Recommendation                                                                                                                                                                                                                                                                                                         | Page No |
|---------------------------|---------|------------------------------------------------------------------------------------------------------------------------------------------------------------------------------------------------------------------------------------------------------------------------------------------------------------------------|---------|
| <b>Title and abstract</b> | 1       | (a) Indicate the study's design with a commonly used term in the title or the abstract                                                                                                                                                                                                                                 | 1       |
|                           |         | (b) Provide in the abstract an informative and balanced summary of what was done and what was found                                                                                                                                                                                                                    | 2       |
| <b>Introduction</b>       |         |                                                                                                                                                                                                                                                                                                                        |         |
| Background/rationale      | 2       | Explain the scientific background and rationale for the investigation being reported                                                                                                                                                                                                                                   | 5       |
| Objectives                | 3       | State specific objectives, including any prespecified hypotheses                                                                                                                                                                                                                                                       | 6       |
| <b>Methods</b>            |         |                                                                                                                                                                                                                                                                                                                        |         |
| Study design              | 4       | Present key elements of study design early in the paper                                                                                                                                                                                                                                                                | 6       |
| Setting                   | 5       | Describe the setting, locations, and relevant dates, including periods of recruitment, exposure, follow-up, and data collection                                                                                                                                                                                        |         |
| Participants              | 6       | (a) Give the eligibility criteria, and the sources and methods of selection of participants. Describe methods of follow-up                                                                                                                                                                                             | 7       |
|                           |         | (b) For matched studies, give matching criteria and number of exposed and unexposed                                                                                                                                                                                                                                    | 7       |
| Variables                 | 7       | Clearly define all outcomes, exposures, predictors, potential confounders, and effect modifiers. Give diagnostic criteria, if applicable                                                                                                                                                                               | 7       |
| Data sources/measurement  | 8*      | For each variable of interest, give sources of data and details of methods of assessment (measurement). Describe comparability of assessment methods if there is more than one group                                                                                                                                   | 7       |
| Bias                      | 9       | Describe any efforts to address potential sources of bias                                                                                                                                                                                                                                                              | 7       |
| Study size                | 10      | Explain how the study size was arrived at                                                                                                                                                                                                                                                                              | 7       |
| Quantitative variables    | 11      | Explain how quantitative variables were handled in the analyses. If applicable, describe which groupings were chosen and why                                                                                                                                                                                           | 7       |
| Statistical methods       | 12      | (a) Describe all statistical methods, including those used to control for confounding<br>(b) Describe any methods used to examine subgroups and interactions<br>(c) Explain how missing data were addressed<br>(d) If applicable, explain how loss to follow-up was addressed<br>(e) Describe any sensitivity analyses | 8       |
| <b>Results</b>            |         |                                                                                                                                                                                                                                                                                                                        |         |
| Participants              | 13*     | (a) Report numbers of individuals at each stage of study—eg numbers potentially eligible, examined for eligibility, confirmed eligible, included in the study, completing follow-up, and analysed<br>(b) Give reasons for non-participation at each stage<br>(c) Consider use of a flow diagram                        | 8       |
| Descriptive data          | 14*     | (a) Give characteristics of study participants (eg demographic, clinical, social) and information on exposures and potential confounders<br>(b) Indicate number of participants with missing data for each variable of interest<br>(c) Summarise follow-up time (eg, average and total amount)                         | 8       |
| Outcome data              | 15*     | Report numbers of outcome events or summary measures over time                                                                                                                                                                                                                                                         | 9       |

|    |                          |    |                                                                                                                                                                                                              |    |
|----|--------------------------|----|--------------------------------------------------------------------------------------------------------------------------------------------------------------------------------------------------------------|----|
| 1  | Main results             | 16 | (a) Give unadjusted estimates and, if applicable, confounder-adjusted estimates and their precision (eg, 95% confidence interval). Make clear which confounders were adjusted for and why they were included | 9  |
| 2  |                          |    | (b) Report category boundaries when continuous variables were categorized                                                                                                                                    |    |
| 3  |                          |    | (c) If relevant, consider translating estimates of relative risk into absolute risk for a meaningful time period                                                                                             |    |
| 4  |                          |    |                                                                                                                                                                                                              |    |
| 5  |                          |    |                                                                                                                                                                                                              |    |
| 6  |                          |    |                                                                                                                                                                                                              |    |
| 7  |                          |    |                                                                                                                                                                                                              |    |
| 8  |                          |    |                                                                                                                                                                                                              |    |
| 9  | Other analyses           | 17 | Report other analyses done—eg analyses of subgroups and interactions, and sensitivity analyses                                                                                                               | 9  |
| 10 |                          |    |                                                                                                                                                                                                              |    |
| 11 | <b>Discussion</b>        |    |                                                                                                                                                                                                              |    |
| 12 |                          |    |                                                                                                                                                                                                              |    |
| 13 | Key results              | 18 | Summarise key results with reference to study objectives                                                                                                                                                     | 9  |
| 14 | Limitations              | 19 | Discuss limitations of the study, taking into account sources of potential bias or imprecision. Discuss both direction and magnitude of any potential bias                                                   | 10 |
| 15 |                          |    |                                                                                                                                                                                                              |    |
| 16 | Interpretation           | 20 | Give a cautious overall interpretation of results considering objectives, limitations, multiplicity of analyses, results from similar studies, and other relevant evidence                                   | 10 |
| 17 |                          |    |                                                                                                                                                                                                              |    |
| 18 |                          |    |                                                                                                                                                                                                              |    |
| 19 | Generalisability         | 21 | Discuss the generalisability (external validity) of the study results                                                                                                                                        | 11 |
| 20 |                          |    |                                                                                                                                                                                                              |    |
| 21 | <b>Other information</b> |    |                                                                                                                                                                                                              |    |
| 22 | Funding                  | 22 | Give the source of funding and the role of the funders for the present study and, if applicable, for the original study on which the present article is based                                                | 12 |
| 23 |                          |    |                                                                                                                                                                                                              |    |
| 24 |                          |    |                                                                                                                                                                                                              |    |

\*Give information separately for exposed and unexposed groups.

**Note:** An Explanation and Elaboration article discusses each checklist item and gives methodological background and published examples of transparent reporting. The STROBE checklist is best used in conjunction with this article (freely available on the Web sites of PLoS Medicine at <http://www.plosmedicine.org/>, Annals of Internal Medicine at <http://www.annals.org/>, and Epidemiology at <http://www.epidem.com/>). Information on the STROBE Initiative is available at <http://www.strobe-statement.org>.

# BMJ Open

## Epidemiology and risk factors for diabetes in the suburbs of Beijing: a retrospective cohort study

|                                 |                                                                                                                                                                                           |
|---------------------------------|-------------------------------------------------------------------------------------------------------------------------------------------------------------------------------------------|
| Journal:                        | <i>BMJ Open</i>                                                                                                                                                                           |
| Manuscript ID                   | bmjopen-2020-041526.R2                                                                                                                                                                    |
| Article Type:                   | Original research                                                                                                                                                                         |
| Date Submitted by the Author:   | 28-Feb-2021                                                                                                                                                                               |
| Complete List of Authors:       | Xie, Lingding; China-Japan Friendship Hospital<br>Zhao, Xu; Civil Aviation General Hospital<br>Zhang, Bo; China-Japan Friendship Hospital,<br>Zhu, Haiqing; China Meitan General Hospital |
| <b>Primary Subject Heading</b>: | Epidemiology                                                                                                                                                                              |
| Secondary Subject Heading:      | Diabetes and endocrinology                                                                                                                                                                |
| Keywords:                       | General diabetes < DIABETES & ENDOCRINOLOGY, EPIDEMIOLOGY, PUBLIC HEALTH                                                                                                                  |
|                                 |                                                                                                                                                                                           |

SCHOLARONE™  
Manuscripts

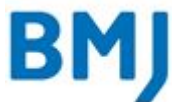

I, the Submitting Author has the right to grant and does grant on behalf of all authors of the Work (as defined in the below author licence), an exclusive licence and/or a non-exclusive licence for contributions from authors who are: i) UK Crown employees; ii) where BMJ has agreed a CC-BY licence shall apply, and/or iii) in accordance with the terms applicable for US Federal Government officers or employees acting as part of their official duties; on a worldwide, perpetual, irrevocable, royalty-free basis to BMJ Publishing Group Ltd ("BMJ") its licensees and where the relevant Journal is co-owned by BMJ to the co-owners of the Journal, to publish the Work in this journal and any other BMJ products and to exploit all rights, as set out in our [licence](#).

The Submitting Author accepts and understands that any supply made under these terms is made by BMJ to the Submitting Author unless you are acting as an employee on behalf of your employer or a postgraduate student of an affiliated institution which is paying any applicable article publishing charge ("APC") for Open Access articles. Where the Submitting Author wishes to make the Work available on an Open Access basis (and intends to pay the relevant APC), the terms of reuse of such Open Access shall be governed by a Creative Commons licence – details of these licences and which [Creative Commons](#) licence will apply to this Work are set out in our licence referred to above.

Other than as permitted in any relevant BMJ Author's Self Archiving Policies, I confirm this Work has not been accepted for publication elsewhere, is not being considered for publication elsewhere and does not duplicate material already published. I confirm all authors consent to publication of this Work and authorise the granting of this licence.

1  
2  
3  
4 **1. Epidemiology and risk factors for diabetes in the suburbs of**  
5  
6  
7 **2 Beijing: a retrospective cohort study**  
8  
9

10 3

11  
12 4 Lingding Xie\*,<sup>1</sup> Xu Zhao\*,<sup>2</sup> Bo Zhang,<sup>1</sup> Haiqing Zhu <sup>3</sup>  
13  
14 5

15  
16 **6 Author Affiliations**  
17  
18

19  
20 7 <sup>1</sup>Endocrinology Department, China-Japan Friendship Hospital, Beijing/100029, China  
21

22 8 <sup>2</sup>Endocrinology Department, Civil Aviation General Hospital, Beijing/100123, China  
23

24 9 <sup>3</sup> Endocrinology Department, China Meitan General Hospital, Beijing/100028, China  
25  
26  
27

28 10

29  
30  
31 \* These authors contributed equally to this work and should be regarded as co-first  
32  
33 authors  
34  
35

36 13

37  
38 **14 Correspondence**  
39

40 15 Bo Zhang, MD., Ph.D.  
41

42 16 Department of Endocrinology,  
43

44 17 China-Japan Friendship Hospital,  
45

46 18 No. 2 Yinghua East Street, Chaoyang District,  
47

48 19 Beijing 100029, P.R. China  
49

50 20 Phone: +86-10-84205254  
51

52 21 Fax: +86-10-84205664  
53

54 22 E-mail address: [drbozhang@yahoo.com](mailto:drbozhang@yahoo.com)  
55  
56  
57  
58  
59  
60



1  
2  
3  
4 24 **Abstract**

5 25 **Objective** We aimed to detect the incidence and risk factors of type 2 diabetes  
6 mellitus (T2DM) development in the suburbs of Beijing.  
7  
8

9 26  
10 27 **Design** Cohort study with record linkage to incidence data.

11 28 **Setting** We performed a 5-year follow-up study in a randomly selected suburban  
12 population including 1,114 subjects aged  $\geq 18$  years living in the suburbs of Beijing.  
13  
14

15 29  
16 30 **Participants** 118 subjects with T2DM at baseline according to the 1999 WHO criteria  
17 were excluded, and 895 subjects attended the follow-up assessment in 2012. The non-  
18 diabetic subjects at baseline were classified into two groups: normal glucose tolerance  
19 (NGT) group (n=673) and impaired glucose regulation (IGR) group (n=222). The  
20 incidence and risk factors of diabetes development in each group were investigated.  
21  
22  
23  
24

25 31  
26 32 **Outcome measures** A structured questionnaire about sociodemographic  
27 characteristics, height, weight, waist circumference, hip circumference, blood  
28 pressure, oral glucose tolerance test, and serum lipid levels.  
29  
30  
31

32 32  
33 33 **Results** Out of the 895 non-diabetic subjects, 67 developed diabetes with 29 in the  
34 NGT group and 38 in the IGR group respectively after a 5-year follow-up, producing  
35 an overall 5-year cumulative incidence of diabetes of 13%. The incidence of diabetes  
36 was 15.5 cases per 1000 person-years, 8.9 cases per 1000 person-years in the NGT  
37 group and 35.7 cases per 1000 person-years in the IGR group ( $P < 0.01$ ;  $RR = 4.03$ ;  
38 95%  $CI: 2.58-9.29$ ). Binary logistic regression analysis showed that the risk factors for  
39 diabetes development included fasting plasma glucose (FPG) in the NGT group, and  
40 sex, the waist-to-hip ratio (WHR), FPG and diastolic blood pressure (DBP) in the IGR  
41 group.  
42  
43  
44  
45  
46  
47  
48  
49

50 50  
51 51 **Conclusions:** During a mean follow-up of 5.0 years, the incidence of T2DM in the  
52 suburbs of Beijing was 15.5 per 1000 person-years. Early prevention of diabetes  
53 should focus on IGR subjects. Elevated FPG predicted diabetes development for both  
54 NGT and IGR subjects. Female sex, overweight/obesity and DBP are risk factors for  
55 diabetes development in IGR subjects.  
56  
57  
58  
59  
60

1  
2  
3  
4  
5  
6  
7  
8  
9  
10  
11  
12  
13  
14  
15  
16  
17  
18  
19  
20  
21  
22  
23  
24  
25  
26  
27  
28  
29  
30  
31  
32  
33  
34  
35  
36  
37  
38  
39  
40  
41  
42  
43  
44  
45  
46  
47  
48  
49  
50  
51  
52  
53  
54  
55  
56  
57  
58  
59  
60  
61  
62  
63  
64

### **Strengths and limitations of this study**

- This study is a retrospective cohort survey of the incidence of T2DM and risk factors in the suburbs of Beijing.
- Has a longitudinal design.
- Selects a cohort by multiple-stage sampling at baseline.
- Has a relatively long follow-up period.
- limitations include that many variables assessed as risk factors were not updated regularly, and the data were collected only at the baseline investigation and at the end of the study.

view only

65

**66 Introduction**

67 Diabetes mellitus is a clinical syndrome characterized by disordered  
68 glycometabolism. The lack and/or insufficiency of insulin induces metabolic disorders  
69 related to saccharides, lipids, proteins, water and electrolytes, resulting in  
70 hyperglycemia as the main clinical feature. Long-term hyperglycemia leads to  
71 macrovascular and microvascular complications, which may result in disability and  
72 death.<sup>1,2</sup> Diabetes is increasingly prevalent, affecting 463 million (9.3%) adults  
73 worldwide, and these figures are expected to increase to 700 million (10.9%) by  
74 2045.<sup>3</sup> Type 2 diabetes mellitus (T2DM) accounts for over 90% of diabetes cases.  
75 Diabetes, as a leading cause of death,<sup>1,3,4</sup> is becoming a public issue, placing a heavy  
76 burden on the health care system.<sup>5</sup> In 2017 approximately 5 million adult deaths  
77 worldwide were attributed to diabetes,<sup>6</sup> and the global healthcare expenditure  
78 associated with people with diabetes in 2019 was estimated to be USD 760 billion.<sup>7</sup>  
79 Because T2DM is usually asymptomatic, it can remain undiagnosed for many years.  
80 Almost half of all people (50.1%) living with diabetes were undiagnosed in 2019.<sup>3</sup>  
81 Accordingly, screening for prediabetes/T2DM and preventing the evolution of  
82 diabetes in individuals with risk factors are essential. Currently, the risk factors  
83 related to T2DM development may include age, the body mass index (BMI), body fat  
84 distribution, a family history of diabetes, a history of cardiovascular disease (CVD), a  
85 history of gestational diabetes mellitus (GDM), race/ethnicity, diet, physical  
86 inactivity, hypertension, dyslipidemia and prediabetes.<sup>4,8-16</sup> Some studies have  
87 demonstrated that birth weight,<sup>17,18</sup> income,<sup>19</sup> socioeconomic status,<sup>20,21</sup> working  
88 hours,<sup>21,22</sup> occupation<sup>23</sup> and genetic factors<sup>24-26</sup> might also contribute to T2DM  
89 development .  
90 In addition to the process of urbanization, the population aging, changes in lifestyle,  
91 and increasing prevalence of obesity and overweight, the prevalence of diabetes in  
92 China has increased over the past three decades. The prevalence of diabetes in China

1  
2  
3  
4 93 was 0.67% in 1980,<sup>27</sup> 2.12% in 1995,<sup>28</sup> 5.5% in 2001,<sup>29</sup> 9.7% in 2008,<sup>30</sup> 9.7% in  
5  
6 94 2010<sup>31</sup> and 10.4% in 2013.<sup>32</sup> As the capital city, limited information is available  
7  
8 95 regarding the incidence of diabetes and prediabetes in Beijing. Certain studies have  
9  
10 96 suggested that different diabetic risk patterns might exist in Asian populations.<sup>33-36</sup>  
11  
12 97 This study aimed to determine the incidence of and risk factors for T2DM among  
13  
14 98 Chinese adults in the suburbs of Beijing.

## 99 **Materials and Methods**

### 100 **Study population**

101 The study population comprised residents living in the suburbs (Huairou, Pinggu and  
102 Hepingli) of Beijing. We used a multistage, stratified sampling method to randomly  
103 select the three suburbs from the Beijing countryside.<sup>30</sup> The details of its sampling  
104 methods have been described previously.<sup>30</sup> Individuals aged 18 years or older who  
105 were willing to participate and provided informed consent were eligible to participate  
106 in the study. People with a history of diabetes were excluded from the study. Pregnant  
107 women were also excluded from the study.

108 We performed a 5-year retrospective cohort study. The baseline survey occurred from  
109 June 2007 to September 2008 using a random sampling method with a follow-up  
110 examination from May to July 2012. All the subjects were asked to undergo a  
111 personal interview, physical examination and blood test [including an oral glucose  
112 tolerance test (OGTT)]. Subjects diagnosed as diabetes by OGTT at baseline were  
113 excluded. The nondiabetic subjects at baseline were divided into the normal glucose  
114 tolerance (NGT) group and impaired glucose regulation (IGR) group according to  
115 OGTT. We analyzed the incidence and risk factors of diabetes development in each  
116 group. Diabetes mellitus was defined according to the 1990 WHO criteria or self-  
117 reported prior diagnosis of diabetes with current medication use. IGR was determined  
118 if the subjects had a fasting plasma glucose (FPG) level of 6.1–6.9 mmol/L and/or a  
119 2-hour plasma glucose level of 7.8–11.0 mmol/L. NGT was defined as FPG less than  
120 6.0mmol/L and a 2-hour plasma glucose level less than 11.1mmol/L.

1  
2  
3  
4 121 **Data collection**

5 122 **Sociodemographic characteristics**—The data were collected by trained staff using a  
6  
7  
8 123 structured questionnaire via a face-to-face interview to assess general information  
9  
10 124 (sex, age, nationality, education status, occupation, and per capita income), personal  
11  
12 125 history (smoking history, alcohol history, physical activity, and dietary habits), family  
13  
14 126 history (diabetes mellitus, hypertension, hyperlipidemia, myocardial infarction,  
15  
16 127 stroke, and obesity), and history of current illness (diabetes, hypertension,  
17  
18 128 hyperlipidemia, cardiovascular, cerebrovascular diseases, and kidney diseases).  
19  
20 129 Subjects who were diagnosed with T2DM between recruitment and the end of follow-  
21  
22 130 up were asked to report the date of diagnosis.

23  
24 131 **Anthropometric measurements** — The subjects were examined for height, weight,  
25  
26 132 waist circumference (WC), hip circumference (HC) and blood pressure. All the  
27  
28 133 subjects were asked to remove their shoes, socks, hats and coats, stand erectly and  
29  
30 134 look forward with their arms relaxed and their heels together. Height was measured in  
31  
32 135 centimeters using a height bar, and weight was measured in kilograms using a digital  
33  
34 136 weighing scale. The WC is the circumference of the waist at the horizontal line of the  
35  
36 137 umbilicus measured in centimeters using a measuring tape, and the HC is the  
37  
38 138 circumference of hips at the horizontal line of the anterior superior spine measured in  
39  
40 139 centimeters using a measuring tape. The BMI was calculated as weight in kilograms  
41  
42 140 divided by the square of height in meters ( $\text{kg}/\text{m}^2$ ), while the waist-to-hip ratio (WHR)  
43  
44 141 was calculated as WC (cm) divided by HC (cm). The blood pressure values used were  
45  
46 142 an average of three measurements, which were measured 2 min apart using a mercury  
47  
48 143 sphygmomanometer. The subjects were asked to stop smoking and consuming alcohol  
49  
50 144 the day before the examination and to sit quietly in a chair for at least 5 minutes  
51  
52 145 before the measurement with their arms bare and placed at the chest level. All the  
53  
54 146 clinical staff members were trained to measure blood pressure and obtain  
55  
56 147 anthropometric measurements.  
57  
58  
59  
60

1  
2  
3  
4 148 **Laboratory examination** —All the subjects were invited to undergo a blood test  
5  
6 149 (including an OGTT) at baseline. The nondiabetic subjects at baseline undergo a  
7  
8 150 secondary blood test (including an OGTT) at the end of follow-up. Venous blood  
9  
10 151 samples after 8–14 hours of fasting were obtained from the subjects to measure FPG,  
11  
12 152 total cholesterol (TC), triglycerides (TGs), high-density lipoprotein cholesterol (HDL-  
13  
14 153 C) and low-density lipoprotein cholesterol (LDL-C). Venous blood samples, after a  
15  
16 154 75 g oral glucose load, were obtained to measure the 2-hour plasma glucose (PG2h).  
17  
18 155 The subjects were instructed to maintain normal physical activity without dietary limit  
19  
20 156 (the intake of saccharides should be no less than 150 g per day) before proceeding  
21  
22 157 with the OGTT.

### 23 24 158 **Statistical analysis**

25  
26 159 We used the P-P plot to test the normality of the numerical variables. The differences  
27  
28 160 in continuous and categorical variables between the NGT and IGR groups were  
29  
30 161 examined using t test and the  $\chi^2$  test statistic, respectively. Kaplan–Meier survival  
31  
32 162 estimates were used to calculate the 5-year cumulative incidence of T2DM. The log-  
33  
34 163 rank test was used to compare the survival curves. The Mantel–Haenszel  $\chi^2$  test of  
35  
36 164 trends was used to analyze the ordinal data. Binary logistic regression analyses were  
37  
38 165 used to estimate the odds ratio and 95% confidence interval for diabetes development.  
39  
40 166 All the analyses were performed using SPSS statistical software version 17.0, and a P  
41  
42 167 value<0.05 was considered statistically significant.

### 43 44 168 **Patient and Public Involvement**

45  
46 169 Patients or the public were not involved in the design, or conduct, or reporting, or  
47  
48 170 dissemination plans of our research.

### 49 50 171 **Results**

#### 51 52 172 **Characteristics of the study population at baseline**

53  
54 173 In total, 1,114 residents participated in the study, and 1,014 subjects completed the  
55  
56 174 follow-up, with an overall response rate of 91.0%. After eliminating 118 subjects who  
57  
58 175 were diagnosed with diabetes by OGTT at baseline and one subject with severe data  
59  
60

1  
2  
3  
4 176 deficiency, 895 subjects (308 men and 587 women) with a mean age of 48.1±11.9  
5  
6 177 years were included in the analysis, with 673 in the NGT group and 222 in the IGR  
7  
8 178 group. The baseline characteristics of the 895 subjects in the study are shown in Table  
9  
10 179 1. Continuous variables were expressed as means±standard deviation (sd) and were  
11  
12 180 examined using a t test, while categorical variables were expressed as percentages and  
13  
14 181 were examined using the  $\chi^2$  test. No significant difference was found between the  
15  
16 182 NGT group and the IGR group in sex, height, family history of T2DM, smoking  
17  
18 183 history, alcohol history, exercise time, diastolic blood pressure (DBP) or HDL-C.  
19  
20 184 Age, weight, BMI, WC, WHR, systolic blood pressure (SBP), FPG, PG2h, TGs, TC  
21  
22 185 and LDL-C in the IGR group were significantly higher than those in the NGT group.

### 186 **Incidence of T2DM**

187 During the follow-up, T2DM developed in 67 subjects, 29 in the NGT group and 38  
188 in the IGR group, resulting in T2DM onset rates of 15.45, 8.86 and 35.67 per 1,000  
189 person-years in the total study population, NGT group and IGR group, respectively  
190 (Table 2). The difference in the incidence of T2DM between the NGT group and IGR  
191 group was statistically significant ( $\chi^2=37.38$ ;  $P<0.01$ ;  $RR=4.03$ ; 95% CI: 2.58-9.29).  
192 The 5-year cumulative incidence of T2DM was 13%, with 10% in the NGT group and  
193 20% in the IGR group. The mean follow-up duration was 5.008 years (SE=0.013;  
194 95% CI: 4.982–5.033), with 5.003 years (SE=0.012; 95% CI: 5.010–5.056) in the  
195 NGT group and 4.933 years (SE=0.038; 95% CI: 4.859–5.007) in the IGR group.  
196 Using the log-rank test, we found that the cumulative incidence of T2DM in the IGR  
197 group was significantly higher than that in the NGT group ( $\chi^2=36.905$ ;  $P<0.0001$ ).  
198 The results of the Kaplan–Meier survival analyses are shown in Figure 1.

### 199 **Analyses of the risk factors for diabetes development**

200 The results of binary logistic regression analyses for T2DM development in the NGT  
201 and IGR groups are shown in Table 3. FPG contributed to T2DM development in the  
202 NGT group, and the OR was 6.111 (1.379, 27.070;  $P=0.017$ ). Sex, WHR, DBP, and  
203 FPB contributed to T2DM development in the IGR group, and the ORs were 7.293

1  
2  
3  
4 204 (1.074, 49.549; P=0.042), 2.874E8 (8.386, 9.847E15; P=0.028), 1.068 (1.009, 1.130;  
5  
6 205 P=0.024) and 7.243 (2.314, 22.673; P=0.001), respectively. The increase in exercise  
7  
8 206 time slightly decreased the risk of T2DM in the IGR group, with an OR of 0.923  
9  
10 207 (0.847, 1.005; P=0.066).

## 11 208 **Discussion**

12  
13  
14 209 The prevalence of diabetes mellitus has been increasing markedly in recent decades.  
15  
16 210 Among adults aged 20–79 years in 2019, there were an estimated 463 million cases of  
17  
18 211 diabetes<sup>3</sup>. However, the striking prevalence may be partly attributable to the increase  
19  
20 212 in population and prolongation of the life-span.<sup>37</sup> Accordingly, we studied the  
21  
22 213 growing trend of T2DM by investigating the cumulative incidence of T2DM. Our  
23  
24 214 results showed that 15.45 new cases of diabetes per 1,000 people-years were  
25  
26 215 diagnosed during the five-year observation period (2007–2012). This marked trend is  
27  
28 216 consistent with diabetes incidence rates worldwide, such as those described in the  
29  
30 217 ATTICA study in Greece (12.9 cases per 1,000 person-years from 2002 to 2012)<sup>38</sup>  
31  
32 218 and those described in a study conducted in Mexico (12.7 cases per 1,000 person-  
33  
34 219 years from 1990 to 2008).<sup>39</sup> The incidence rate found in our study is lower than that in  
35  
36 220 a study of Pima Indians (23.5 cases per 1,000 person-years during 1991 to 2003)<sup>40</sup> and  
37  
38 221 in a study conducted in northern Spain (95.2 cases per 1,000 person-years during  
39  
40 222 1998 to 2005)<sup>41</sup> and is higher than that observed in a study conducted in Iran (10.6  
41  
42 223 cases per 1000 person-years from 1999 to 2011)<sup>42</sup> and in the SUPREME-DM project  
43  
44 224 in the USA (11.5 cases per 1000 person-years from 2006 to 2011).<sup>43</sup> The T2DM  
45  
46 225 incidence in the suburbs of Beijing is higher than that identified in the investigation  
47  
48 226 conducted by Wang C et al in a Chinese population in 2010 (9.5 cases per 1000  
49  
50 227 person-years in men and 9.2 in women).<sup>44</sup> This difference may partly be due to the  
51  
52 228 relatively higher standard of living in the suburbs of Beijing.  
53  
54 229 Diabetes development is based on the interaction between genes and lifestyle and  
55  
56 230 environmental factors.<sup>45,46</sup> Compared with the NGT group that had an incidence of  
57  
58 231 8.86 cases per 1,000 person-years, the IGR group (35.67 cases per 1,000 person-  
59  
60



1  
2  
3  
4 232 years) had a higher incidence rate (RR=4.03;95% CI: 2.58–9.29;P<0.01). In our  
5  
6 233 study, diabetes development was mainly the consequence of elevated FPG in the NGT  
7  
8 234 group. Diabetes development was mainly associated with sex (female), abnormal  
9  
10 235 WHR, elevated DBP and elevated FPG in the IGR group. The increase in the FPG  
11  
12 236 level was a strong predictor of diabetes development in both the NGT group and IGR  
13  
14 237 group, with 6.111- and 7.243-fold increased risk per unit increase, respectively.  
15  
16 238 In our study, the WHR measurement was found to predict diabetes risk. Some studies  
17  
18 239 have declared that WHR, as an obesity indicator, is superior to BMI and WC.<sup>47,48</sup> A  
19  
20 240 meta-analysis demonstrated that either BMI or WC (WHR) predicted or was  
21  
22 241 independently associated with type 2 diabetes, regardless of the controversial findings  
23  
24 242 regarding which was better.<sup>49</sup>  
25  
26 243 Age and family history of diabetes are considered risk factors for diabetes  
27  
28 244 development.<sup>4,8-16</sup> However, we found only an increasing trend of diabetes  
29  
30 245 development in the elderly population and subjects with a family history of diabetes  
31  
32 246 (P>0.05). This finding might be related to the short period of follow-up and the  
33  
34 247 subjects' unawareness of their family history of diabetes.  
35  
36 248 There is evidence that T2DM can be prevented in high-risk individuals by a lifestyle  
37  
38 249 program of regular exercise.<sup>50,51</sup> Surprisingly, our study found that exercise did not  
39  
40 250 exert a beneficial effect on diabetes incidence, a finding similar to that in the ATTICA  
41  
42 251 study.<sup>38,52</sup> However, we found a decreasing trend in the diabetes incidence with  
43  
44 252 increasing exercise time. The increase in exercise time slightly decreased the risk of  
45  
46 253 T2DM in the IGR group, with an OR of 0.923 (0.847, 1.005; P=0.066).  
47  
48 254 The strength of our study is that it was based on a cohort selected by multiple stage  
49  
50 255 sampling at baseline with a relatively long follow-up period. A limitation is that many  
51  
52 256 variables assessed as risk factors were not updated regularly, and might have changed  
53  
54 257 during the follow-up period. Secondly, the follow-up could not be random due to the  
55  
56 258 limitations of the conditions. Additionally, the data were collected only at the baseline  
57  
58 259 investigation and at the end of the study.  
59  
60

## 260 **Conclusions**

261 During a mean follow-up of 5.0 years, the incidence of T2DM in the suburbs of  
262 Beijing was 15.45 cases per 1000 person-years, which was relatively higher than that  
263 in many other areas worldwide. Compared with the NGT subjects, the IGR subjects  
264 were more susceptible to T2DM. To prevent diabetes development, all the subjects  
265 should be evaluated for elevated FPG. Additionally, sex, WHR, and DBP were  
266 predictors of T2DM in IGR subjects.

267 The findings in this study provide new data on the incidence of T2DM in the Beijing  
268 area. The predictors of T2DM reported in the present study may be conducive to  
269 formulating a protocol for diabetes prevention.

## 270 **Authors' contributions**

271 Conceptualization, B.Z.; Data curation, H.Z.; Formal analysis, H.Z.; Investigation,  
272 L.X. and X.Z.; Methodology, B.Z.; Project administration, L.X., X.Z. and B.Z.;  
273 Writing – original draft, L.X. and X.Z.; Writing – review & editing, B.Z.. All authors  
274 read and approved the final manuscript, as well as the submission of this work. B.Z.  
275 supervised and managed the data. B.Z. is the guarantor of this work.

## 277 **Conflicts of interest**

278 The authors declare that they have no conflicts of interest.

280 **Competing interests** None declared.

## 282 **Funding statement**

283 The study was supported by grants from the 11th Five-year National Science and  
284 Technology Support Program (2009BAI80B04).

1  
2  
3  
4  
5  
6  
7  
8  
9  
10  
11  
12  
13  
14  
15  
16  
17  
18  
19  
20  
21  
22  
23  
24  
25  
26  
27  
28  
29  
30  
31  
32  
33  
34  
35  
36  
37  
38  
39  
40  
41  
42  
43  
44  
45  
46  
47  
48  
49  
50  
51  
52  
53  
54  
55  
56  
57  
58  
59  
60

285

286 **Ethics approval**

287 Ethical approval was obtained from the Ethics Committee of Clinical Trials of  
288 Drugs/Devices in China-Japan Friendship Hospital (2011-049).

289

290 **Data availability statement**

291 All data included in this study are available from the corresponding author on  
292 reasonable request.

293

295 **Table 1 Comparison of the characteristics of the NGT and IGR subjects at**  
 296 **baseline**

| Variable at baseline         | NGT group<br>(n=673) | IGR group<br>(n=222) | t or $\chi^2$ , <i>P</i> value |
|------------------------------|----------------------|----------------------|--------------------------------|
| Sex(%male)                   | 34.9                 | 32.9                 | 0.306, 0.625                   |
| Age (years)                  | 46.75±11.57          | 52.01±12.03          | -5.813, <0.001                 |
| Height (cm)                  | 161.85±7.94          | 161.18±7.83          | 1.092, 0.275                   |
| Weight (kg)                  | 64.32±10.75          | 67.49±11.05          | -3.777, <0.001                 |
| BMI (kg/m <sup>2</sup> )     | 24.52±3.40           | 25.93±3.50           | -5.332, <0.001                 |
| WC (cm)                      | 83.04±9.75           | 86.82±9.20           | -5.075, <0.001                 |
| WHR                          | 0.87±0.07            | 0.89±0.06            | -3.495, <0.001                 |
| SBP (mmHg)                   | 119.71±18.37         | 125.18±20.13         | -3.582, <0.001                 |
| DBP (mmHg)                   | 78.02±11.21          | 79.75±12.66          | -1.843, 0.066                  |
| FPG (mmol/L)                 | 5.25±0.42            | 5.82±0.61            | -15.875, <0.001                |
| PG2h (mmol/L)                | 5.90±1.01            | 8.29±1.52            | -26.692, <0.001                |
| TGs (mmol/L)                 | 1.42±1.17            | 1.61±1.08            | -2.165, 0.031                  |
| TC (mmol/L)                  | 4.56±0.92            | 4.84±0.95            | -3.865, <0.001                 |
| HDL-C (mmol/L)               | 1.35±0.34            | 1.34±0.36            | 0.464, 0.643                   |
| LDL-C (mmol/L)               | 2.77±0.77            | 3.08±0.81            | -4.648, <0.001                 |
| Exercise duration<br>(hours) | 5.85±11.81           | 5.59±8.06            | 0.305, 0.761                   |
| FH of T2DM (%)               | 15.5                 | 21.4                 | 3.722, 0.068                   |
| Smoking history (%)          | 22.4                 | 20.7                 | 0.286, 0.641                   |
| Alcohol history (%)          | 27.9                 | 28.8                 | 0.076, 0.796                   |
| Years of follow-up<br>(year) | 4.85±0.32            | 4.79±0.56            | 2.081, 0.038                   |

297 BMI, body mass index; WC, waist circumference; WHR, waist-to-hip ratio; SBP,  
 298 systolic blood pressure; DBP, diastolic blood pressure; FPG, fasting plasma glucose;

1  
2  
3  
4  
5  
6  
7  
8  
9  
10  
11  
12  
13  
14  
15  
16  
17  
18  
19  
20  
21  
22  
23  
24  
25  
26  
27  
28  
29  
30  
31  
32  
33  
34  
35  
36  
37  
38  
39  
40  
41  
42  
43  
44  
45  
46  
47  
48  
49  
50  
51  
52  
53  
54  
55  
56  
57  
58  
59  
60

299 PG2h, 2-hour plasma glucose; TC, total cholesterol; TGs, triglycerides; HDL-C, high-  
300 density lipoprotein cholesterol; LDL-C, low-density lipoprotein cholesterol; FH,  
301 family history. Exercise duration is expressed as hours per week.  
302

For peer review only

303 **Table 2. Incidence of T2DM during the follow-up**

|           | Cases of diabetes | Follow-up (person-<br>years) | Incidence (per 1,000<br>person-years) |
|-----------|-------------------|------------------------------|---------------------------------------|
| NGT group | 29                | 3,271.5                      | 8.86                                  |
| IGR group | 38                | 1,065.3                      | 35.67                                 |
| Total     | 67                | 4,336.8                      | 15.45                                 |

304

305

306 **Table 3. Multivariate logistic regression model for T2DM development**

|                           | NGT group               |                | IGR group                 |                |
|---------------------------|-------------------------|----------------|---------------------------|----------------|
|                           | OR (95% CI)             | <i>P</i> value | OR (95% CI)               | <i>P</i> value |
| Sex                       | 0.375 (0.067, 2.103)    | 0.265          | 7.293 (1.074, 49.549)     | 0.042          |
| Age (years)               | 1.013 (0.962, 1.068)    | 0.615          | 1.019 (0.964, 1.077)      | 0.499          |
| Weight (kg)               | 1.044 (0.927, 1.175)    | 0.478          | 1.056 (0.929, 1.200)      | 0.402          |
| BMI (kg/m <sup>2</sup> )  | 0.934 (0.653, 1.336)    | 0.710          | 0.971 (0.661, 1.427)      | 0.881          |
| WC (cm)                   | 1.073 (0.936, 1.230)    | 0.311          | 0.904 (0.748, 1.092)      | 0.295          |
| WHR                       | 0.006 (0.000, 7058.081) | 0.473          | 2.874E8 (8.386, 9.847E15) | 0.028          |
| SBP (mmHg)                | 1.013 (0.976, 1.052)    | 0.492          | 0.992 (0.958, 1.026)      | 0.637          |
| DBP (mmHg)                | 0.955 (0.890, 1.024)    | 0.198          | 1.068 (1.009, 1.130)      | 0.024          |
| FPG (mmol/L)              | 6.111 (1.379, 27.070)   | 0.017          | 7.243 (2.314, 22.673)     | 0.001          |
| TC (mmol/L)               | 2.719 (0.917, 8.067)    | 0.071          | 0.814 (0.141, 4.699)      | 0.818          |
| TGs (mmol/L)              | 0.996 (0.589, 1.684)    | 0.989          | 0.926 (0.491, 1.749)      | 0.813          |
| HDL-C (mmol/L)            | 2.536 (0.519, 12.395)   | 0.250          | 0.622 (0.071, 5.460)      | 0.669          |
| LDL-C (mmol/L)            | 0.604 (0.206, 1.769)    | 0.358          | 1.070 (0.181, 6.321)      | 0.941          |
| Exercise duration (hours) | 1.013 (0.947, 1.084)    | 0.707          | 0.923 (0.847, 1.005)      | 0.066          |
| FH of T2DM                | 1.868 (0.492, 7.090)    | 0.358          | 2.062 (0.656, 6.478)      | 0.215          |
| Smoking history           | 0.766 (0.186, 3.162)    | 0.713          | 1.591 (0.346, 7.317)      | 0.551          |
| Alcohol history           | 0.726 (0.202, 2.610)    | 0.624          | 1.685 (0.458, 6.203)      | 0.432          |

307 BMI, body mass index; WC, waist circumference; WHR, waist-to-hip ratio; SBP,  
308 systolic blood pressure; DBP, diastolic blood pressure; FPG, fasting plasma glucose;  
309 TC, total cholesterol; TGs, triglycerides; HDL-C, high-density lipoprotein cholesterol;  
310 LDL-C, low-density lipoprotein cholesterol; FH, family history. Sex is defined as  
311 male (n=1) or female (n=2), FH of T2DM is defined as no (n=1) or yes (n=2),

1  
2  
3  
4 312 smoking history was defined as no (n=1) or yes (n=2), and alcohol history was  
5  
6 313 defined as no (n=1) or yes (n=2). Exercise duration is expressed as hours per week.  
7  
8 314  
9 315  
10  
11 316  
12  
13  
14  
15  
16  
17  
18  
19  
20  
21  
22  
23  
24  
25  
26  
27  
28  
29  
30  
31  
32  
33  
34  
35  
36  
37  
38  
39  
40  
41  
42  
43  
44  
45  
46  
47  
48  
49  
50  
51  
52  
53  
54  
55  
56  
57  
58  
59  
60

For peer review only



1  
2  
3  
4  
5  
6  
7  
8  
9  
10  
11  
12  
13  
14  
15  
16  
17  
18  
19  
20  
21  
22  
23  
24  
25  
26  
27  
28  
29  
30  
31  
32  
33  
34  
35  
36  
37  
38  
39  
40  
41  
42  
43  
44  
45  
46  
47  
48  
49  
50  
51  
52  
53  
54  
55  
56  
57  
58  
59  
60

317 **Figure legend**

318 Figure 1. Cumulative incidence of T2DM in the NGT and IGR groups (log-rank test:

319  $\chi^2=36.905;P<0.0001$ )

320

321

322

323

324

For peer review only

325 **References**

- 326 1. Mortality GBD, Causes of Death C. Global, regional, and national age-sex specific all-cause and  
327 cause-specific mortality for 240 causes of death, 1990-2013: a systematic analysis for the Global  
328 Burden of Disease Study 2013. *Lancet* 2015;385:117-71.
- 329 2. Wong E, Backholer K, Gearon E, et al. Diabetes and risk of physical disability in adults: a  
330 systematic review and meta-analysis. *Lancet Diabetes Endocrinol* 2013;1:106-14.
- 331 3. Sinclair A, Saeedi P, Kaundal A, Karuranga S, Malanda B, Williams R. Diabetes and global  
332 ageing among 65-99-year-old adults: Findings from the International Diabetes Federation Diabetes  
333 Atlas, 9(th) edition. *Diabetes Res Clin Pract* 2020;162:108078.
- 334 4. Mc Donald Posso AJ, Bradshaw Meza RA, Mendoza Morales EA, Jaen Y, Cumbreira Ortega A,  
335 Mendoza Posada EJ. Diabetes in Panama: Epidemiology, Risk Factors, and Clinical Management. *Ann*  
336 *Glob Health* 2015;81:754-64.
- 337 5. Bommer C, Sagalova V, Heesemann E, et al. Global Economic Burden of Diabetes in Adults:  
338 Projections From 2015 to 2030. *Diabetes Care* 2018;41:963-70.
- 339 6. Cho NH, Shaw JE, Karuranga S, et al. IDF Diabetes Atlas: Global estimates of diabetes  
340 prevalence for 2017 and projections for 2045. *Diabetes Res Clin Pract* 2018;138:271-81.
- 341 7. Williams R, Karuranga S, Malanda B, et al. Global and regional estimates and projections of  
342 diabetes-related health expenditure: Results from the International Diabetes Federation Diabetes Atlas,  
343 9th edition. *Diabetes Res Clin Pract* 2020;162:108072.
- 344 8. Weber MB, Oza-Frank R, Staimez LR, Ali MK, Narayan KM. Type 2 diabetes in Asians:  
345 prevalence, risk factors, and effectiveness of behavioral intervention at individual and population  
346 levels. *Annu Rev Nutr* 2012;32:417-39.
- 347 9. Perez CM, Soto-Salgado M, Suarez E, Guzman M, Ortiz AP. High Prevalence of Diabetes and  
348 Prediabetes and Their Coexistence with Cardiovascular Risk Factors in a Hispanic Community. *J*  
349 *Immigr Minor Health* 2015;17:1002-9.
- 350 10. Aljoudi AS, Taha AZ. Knowledge of diabetes risk factors and preventive measures among  
351 attendees of a primary care center in eastern Saudi Arabia. *Ann Saudi Med* 2009;29:15-9.
- 352 11. American Diabetes A. 2. Classification and Diagnosis of Diabetes: Standards of Medical Care in  
353 Diabetes-2018. *Diabetes Care* 2018;41:S13-S27.
- 354 12. Fletcher B, Gulanick M, Lamendola C. Risk factors for type 2 diabetes mellitus. *J Cardiovasc*  
355 *Nurs* 2002;16:17-23.
- 356 13. Karter AJ, Schillinger D, Adams AS, et al. Elevated rates of diabetes in Pacific Islanders and  
357 Asian subgroups: The Diabetes Study of Northern California (DISTANCE). *Diabetes Care*  
358 2013;36:574-9.
- 359 14. Harjo TC, Perez A, Lopez V, Wong ND. Prevalence of diabetes and cardiovascular risk factors  
360 among California Native American adults compared to other ethnicities: the 2005 California Health  
361 Interview Survey. *Metab Syndr Relat Disord* 2011;9:49-54.
- 362 15. Akter S, Rahman MM, Abe SK, Sultana P. Prevalence of diabetes and prediabetes and their risk  
363 factors among Bangladeshi adults: a nationwide survey. *Bull World Health Organ* 2014;92:204-13,  
364 13A.
- 365 16. Amarasinghe S, Balakumar S, Arasaratnam V. Prevalence and risk factors of diabetes mellitus  
366 among adults in Jaffna District. *Ceylon Med J* 2015;60:107-10.

1  
2  
3  
4  
5  
6  
7  
8  
9  
10  
11  
12  
13  
14  
15  
16  
17  
18  
19  
20  
21  
22  
23  
24  
25  
26  
27  
28  
29  
30  
31  
32  
33  
34  
35  
36  
37  
38  
39  
40  
41  
42  
43  
44  
45  
46  
47  
48  
49  
50  
51  
52  
53  
54  
55  
56  
57  
58  
59  
60

- 367 17. Pettitt DJ, Jovanovic L. Low birth weight as a risk factor for gestational diabetes, diabetes, and  
368 impaired glucose tolerance during pregnancy. *Diabetes Care* 2007;30 Suppl 2:S147-9.
- 369 18. Harder T, Rodekamp E, Schellong K, Dudenhausen JW, Plagemann A. Birth weight and  
370 subsequent risk of type 2 diabetes: a meta-analysis. *Am J Epidemiol* 2007;165:849-57.
- 371 19. Barker L, Crespo R, Gerzoff RB, Denham S, Shrewsbury M, Cornelius-Averhart D. Residence in  
372 a distressed county in Appalachia as a risk factor for diabetes, Behavioral Risk Factor Surveillance  
373 System, 2006-2007. *Prev Chronic Dis* 2010;7:A104.
- 374 20. Espelt A, Arriola L, Borrell C, Larranaga I, Sandin M, Escolar-Pujolar A. Socioeconomic position  
375 and type 2 diabetes mellitus in Europe 1999-2009: a panorama of inequalities. *Curr Diabetes Rev*  
376 2011;7:148-58.
- 377 21. Kivimaki M, Virtanen M, Kawachi I, et al. Long working hours, socioeconomic status, and the  
378 risk of incident type 2 diabetes: a meta-analysis of published and unpublished data from 222 120  
379 individuals. *Lancet Diabetes Endocrinol* 2015;3:27-34.
- 380 22. Bannai A, Yoshioka E, Saijo Y, Sasaki S, Kishi R, Tamakoshi A. The Risk of Developing  
381 Diabetes in Association With Long Working Hours Differs by Shift Work Schedules. *J Epidemiol*  
382 2016;26:481-7.
- 383 23. Honda T, Kuwahara K, Nakagawa T, Yamamoto S, Hayashi T, Mizoue T. Leisure-time,  
384 occupational, and commuting physical activity and risk of type 2 diabetes in Japanese workers: a  
385 cohort study. *BMC Public Health* 2015;15:1004.
- 386 24. Ma RC, Hu C, Tam CH, et al. Genome-wide association study in a Chinese population identifies a  
387 susceptibility locus for type 2 diabetes at 7q32 near PAX4. *Diabetologia* 2013;56:1291-305.
- 388 25. Grarup N, Sandholt CH, Hansen T, Pedersen O. Genetic susceptibility to type 2 diabetes and  
389 obesity: from genome-wide association studies to rare variants and beyond. *Diabetologia*  
390 2014;57:1528-41.
- 391 26. Florez JC, Jablonski KA, Bayley N, et al. TCF7L2 polymorphisms and progression to diabetes in  
392 the Diabetes Prevention Program. *N Engl J Med* 2006;355:241-50.
- 393 27. Guop NDrC. A mass survey of diabetes mellitus in a population of 300,000 in 14 provinces and  
394 municipalities in China (author's transl). *Zhonghua Nei Ke Za Zhi* 1981;20:678-83.
- 395 28. Pan XR, Yang WY, Li GW, Liu J. Prevalence of diabetes and its risk factors in China, 1994.  
396 National Diabetes Prevention and Control Cooperative Group. *Diabetes Care* 1997;20:1664-9.
- 397 29. Chan JC, Malik V, Jia W, et al. Diabetes in Asia: epidemiology, risk factors, and  
398 pathophysiology. *JAMA* 2009;301:2129-40.
- 399 30. Yang W, Lu J, Weng J, et al. Prevalence of diabetes among men and women in China. *N Engl J*  
400 *Med* 2010;362:1090-101.
- 401 31. Xu Y, Wang L, He J, et al. Prevalence and control of diabetes in Chinese adults. *JAMA*  
402 2013;310:948-59.
- 403 32. Wang L, Gao P, Zhang M, et al. Prevalence and Ethnic Pattern of Diabetes and Prediabetes in  
404 China in 2013. *JAMA* 2017;317:2515-23.
- 405 33. Narayan KM, Aviles-Santa L, Oza-Frank R, et al. Report of a National Heart, Lung, And Blood  
406 Institute Workshop: heterogeneity in cardiometabolic risk in Asian Americans In the U.S.  
407 Opportunities for research. *J Am Coll Cardiol* 2010;55:966-73.

- 1  
2  
3 408 34. Oza-Frank R, Ali MK, Vaccarino V, Narayan KM. Asian Americans: diabetes prevalence across  
4 409 U.S. and World Health Organization weight classifications. *Diabetes Care* 2009;32:1644-6.
- 5 410 35. Ma RC, Chan JC. Type 2 diabetes in East Asians: similarities and differences with populations in  
6 411 Europe and the United States. *Ann N Y Acad Sci* 2013;1281:64-91.
- 7 412 36. Gujral UP, Pradeepa R, Weber MB, Narayan KM, Mohan V. Type 2 diabetes in South Asians:  
8 413 similarities and differences with white Caucasian and other populations. *Ann N Y Acad Sci*  
9 414 2013;1281:51-63.
- 10 415 37. Gulland A. Global life expectancy has risen, reports WHO. *BMJ* 2014;348:g3369.
- 11 416 38. Koloverou E, Panagiotakos DB, Pitsavos C, et al. 10-year incidence of diabetes and associated  
12 417 risk factors in Greece: the ATTICA study (2002-2012). *Rev Diabet Stud* 2014;11:181-9.
- 13 418 39. Gonzalez-Villalpando C, Davila-Cervantes CA, Zamora-Macorra M, Trejo-Valdivia B, Gonzalez-  
14 419 Villalpando ME. Incidence of type 2 diabetes in Mexico: results of the Mexico City Diabetes Study  
15 420 after 18 years of follow-up. *Salud Publica Mex* 2014;56:11-7.
- 16 421 40. Pavkov ME, Hanson RL, Knowler WC, Bennett PH, Krakoff J, Nelson RG. Changing patterns of  
17 422 type 2 diabetes incidence among Pima Indians. *Diabetes Care* 2007;30:1758-63.
- 18 423 41. Valdes S, Botas P, Delgado E, Alvarez F, Cadorniga FD. Population-based incidence of type 2  
19 424 diabetes in northern Spain: the Asturias Study. *Diabetes Care* 2007;30:2258-63.
- 20 425 42. Derakhshan A, Sardarina M, Khalili D, Momenan AA, Azizi F, Hadaeigh F. Sex specific  
21 426 incidence rates of type 2 diabetes and its risk factors over 9 years of follow-up: Tehran Lipid and  
22 427 Glucose Study. *PLoS One* 2014;9:e102563.
- 23 428 43. Nichols GA, Schroeder EB, Karter AJ, et al. Trends in diabetes incidence among 7 million  
24 429 insured adults, 2006-2011: the SUPREME-DM project. *Am J Epidemiol* 2015;181:32-9.
- 25 430 44. Wang C, Li J, Xue H, et al. Type 2 diabetes mellitus incidence in Chinese: contributions of  
26 431 overweight and obesity. *Diabetes Res Clin Pract* 2015;107:424-32.
- 27 432 45. Murea M, Ma L, Freedman BI. Genetic and environmental factors associated with type 2 diabetes  
28 433 and diabetic vascular complications. *Rev Diabet Stud* 2012;9:6-22.
- 29 434 46. InterAct C, Langenberg C, Sharp S, et al. Design and cohort description of the InterAct Project:  
30 435 an examination of the interaction of genetic and lifestyle factors on the incidence of type 2 diabetes in  
31 436 the EPIC Study. *Diabetologia* 2011;54:2272-82.
- 32 437 47. Zhao X, Zhu X, Zhang H, et al. Prevalence of diabetes and predictions of its risks using  
33 438 anthropometric measures in southwest rural areas of China. *BMC Public Health* 2012;12:821.
- 34 439 48. Gupta R, Rastogi P, Sarna M, Gupta VP, Sharma SK, Kothari K. Body-mass index, waist-size,  
35 440 waist-hip ratio and cardiovascular risk factors in urban subjects. *J Assoc Physicians India* 2007;55:621-  
36 441 7.
- 37 442 49. Qiao Q, Nyamdorj R. Is the association of type II diabetes with waist circumference or waist-to-  
38 443 hip ratio stronger than that with body mass index? *Eur J Clin Nutr* 2010;64:30-4.
- 39 444 50. Dela F, Prats C, Helge JW. Exercise interventions to prevent and manage type 2 diabetes:  
40 445 physiological mechanisms. *Med Sport Sci* 2014;60:36-47.
- 41 446 51. Teixeira-Lemos E, Nunes S, Teixeira F, Reis F. Regular physical exercise training assists in  
42 447 preventing type 2 diabetes development: focus on its antioxidant and anti-inflammatory properties.  
43 448 *Cardiovasc Diabetol* 2011;10:12.

1  
2  
3  
4  
5  
6  
7  
8  
9  
10  
11  
12  
13  
14  
15  
16  
17  
18  
19  
20  
21  
22  
23  
24  
25  
26  
27  
28  
29  
30  
31  
32  
33  
34  
35  
36  
37  
38  
39  
40  
41  
42  
43  
44  
45  
46  
47  
48  
49  
50  
51  
52  
53  
54  
55  
56  
57  
58  
59  
60

449 52. Panagiotakos DB, Pitsavos C, Skoumas Y, Lentzas Y, Stefanadis C. Five-year incidence of type 2  
450 diabetes mellitus among cardiovascular disease-free Greek adults: findings from the ATTICA study.  
451 *Vasc Health Risk Manag* 2008;4:691-8.  
452

For peer review only

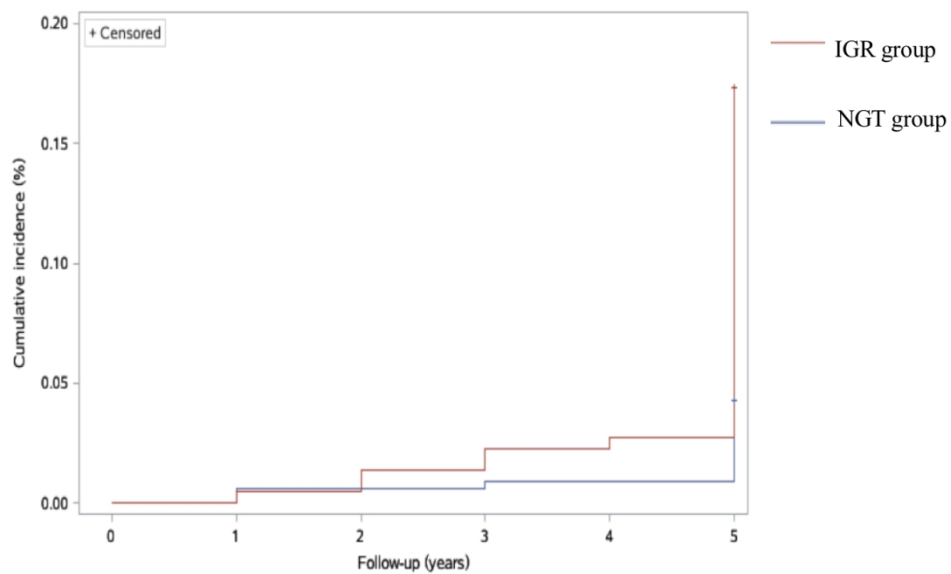

STROBE Statement—Checklist of items that should be included in reports of *cohort studies*

|                           | Item No | Recommendation                                                                                                                                                                                                                                                                                                         | Page No |
|---------------------------|---------|------------------------------------------------------------------------------------------------------------------------------------------------------------------------------------------------------------------------------------------------------------------------------------------------------------------------|---------|
| <b>Title and abstract</b> | 1       | (a) Indicate the study's design with a commonly used term in the title or the abstract                                                                                                                                                                                                                                 | 1       |
|                           |         | (b) Provide in the abstract an informative and balanced summary of what was done and what was found                                                                                                                                                                                                                    | 2       |
| <b>Introduction</b>       |         |                                                                                                                                                                                                                                                                                                                        |         |
| Background/rationale      | 2       | Explain the scientific background and rationale for the investigation being reported                                                                                                                                                                                                                                   | 5       |
| Objectives                | 3       | State specific objectives, including any prespecified hypotheses                                                                                                                                                                                                                                                       | 6       |
| <b>Methods</b>            |         |                                                                                                                                                                                                                                                                                                                        |         |
| Study design              | 4       | Present key elements of study design early in the paper                                                                                                                                                                                                                                                                | 6       |
| Setting                   | 5       | Describe the setting, locations, and relevant dates, including periods of recruitment, exposure, follow-up, and data collection                                                                                                                                                                                        |         |
| Participants              | 6       | (a) Give the eligibility criteria, and the sources and methods of selection of participants. Describe methods of follow-up                                                                                                                                                                                             | 7       |
|                           |         | (b) For matched studies, give matching criteria and number of exposed and unexposed                                                                                                                                                                                                                                    | 7       |
| Variables                 | 7       | Clearly define all outcomes, exposures, predictors, potential confounders, and effect modifiers. Give diagnostic criteria, if applicable                                                                                                                                                                               | 7       |
| Data sources/measurement  | 8*      | For each variable of interest, give sources of data and details of methods of assessment (measurement). Describe comparability of assessment methods if there is more than one group                                                                                                                                   | 7       |
| Bias                      | 9       | Describe any efforts to address potential sources of bias                                                                                                                                                                                                                                                              | 7       |
| Study size                | 10      | Explain how the study size was arrived at                                                                                                                                                                                                                                                                              | 7       |
| Quantitative variables    | 11      | Explain how quantitative variables were handled in the analyses. If applicable, describe which groupings were chosen and why                                                                                                                                                                                           | 7       |
| Statistical methods       | 12      | (a) Describe all statistical methods, including those used to control for confounding<br>(b) Describe any methods used to examine subgroups and interactions<br>(c) Explain how missing data were addressed<br>(d) If applicable, explain how loss to follow-up was addressed<br>(e) Describe any sensitivity analyses | 8       |
| <b>Results</b>            |         |                                                                                                                                                                                                                                                                                                                        |         |
| Participants              | 13*     | (a) Report numbers of individuals at each stage of study—eg numbers potentially eligible, examined for eligibility, confirmed eligible, included in the study, completing follow-up, and analysed<br>(b) Give reasons for non-participation at each stage<br>(c) Consider use of a flow diagram                        | 8       |
| Descriptive data          | 14*     | (a) Give characteristics of study participants (eg demographic, clinical, social) and information on exposures and potential confounders<br>(b) Indicate number of participants with missing data for each variable of interest<br>(c) Summarise follow-up time (eg, average and total amount)                         | 8       |
| Outcome data              | 15*     | Report numbers of outcome events or summary measures over time                                                                                                                                                                                                                                                         | 9       |

|    |                          |    |                                                                                                                                                                                                              |    |
|----|--------------------------|----|--------------------------------------------------------------------------------------------------------------------------------------------------------------------------------------------------------------|----|
| 1  | Main results             | 16 | (a) Give unadjusted estimates and, if applicable, confounder-adjusted estimates and their precision (eg, 95% confidence interval). Make clear which confounders were adjusted for and why they were included | 9  |
| 2  |                          |    | (b) Report category boundaries when continuous variables were categorized                                                                                                                                    |    |
| 3  |                          |    | (c) If relevant, consider translating estimates of relative risk into absolute risk for a meaningful time period                                                                                             |    |
| 4  |                          |    |                                                                                                                                                                                                              |    |
| 5  |                          |    |                                                                                                                                                                                                              |    |
| 6  |                          |    |                                                                                                                                                                                                              |    |
| 7  |                          |    |                                                                                                                                                                                                              |    |
| 8  |                          |    |                                                                                                                                                                                                              |    |
| 9  | Other analyses           | 17 | Report other analyses done—eg analyses of subgroups and interactions, and sensitivity analyses                                                                                                               | 9  |
| 10 |                          |    |                                                                                                                                                                                                              |    |
| 11 | <b>Discussion</b>        |    |                                                                                                                                                                                                              |    |
| 12 |                          |    |                                                                                                                                                                                                              |    |
| 13 | Key results              | 18 | Summarise key results with reference to study objectives                                                                                                                                                     | 9  |
| 14 | Limitations              | 19 | Discuss limitations of the study, taking into account sources of potential bias or imprecision. Discuss both direction and magnitude of any potential bias                                                   | 10 |
| 15 |                          |    |                                                                                                                                                                                                              |    |
| 16 | Interpretation           | 20 | Give a cautious overall interpretation of results considering objectives, limitations, multiplicity of analyses, results from similar studies, and other relevant evidence                                   | 10 |
| 17 |                          |    |                                                                                                                                                                                                              |    |
| 18 |                          |    |                                                                                                                                                                                                              |    |
| 19 | Generalisability         | 21 | Discuss the generalisability (external validity) of the study results                                                                                                                                        | 11 |
| 20 |                          |    |                                                                                                                                                                                                              |    |
| 21 | <b>Other information</b> |    |                                                                                                                                                                                                              |    |
| 22 | Funding                  | 22 | Give the source of funding and the role of the funders for the present study and, if applicable, for the original study on which the present article is based                                                | 12 |
| 23 |                          |    |                                                                                                                                                                                                              |    |
| 24 |                          |    |                                                                                                                                                                                                              |    |

\*Give information separately for exposed and unexposed groups.

**Note:** An Explanation and Elaboration article discusses each checklist item and gives methodological background and published examples of transparent reporting. The STROBE checklist is best used in conjunction with this article (freely available on the Web sites of PLoS Medicine at <http://www.plosmedicine.org/>, Annals of Internal Medicine at <http://www.annals.org/>, and Epidemiology at <http://www.epidem.com/>). Information on the STROBE Initiative is available at <http://www.strobe-statement.org>.
