# Supplementary material for: Epidemiology and risk factors for diabetes in the suburbs of Beijing: a retrospective cohort study
Source: PubMed Central journal article supplement — BMJ Open. 2021 Mar 25;11(3):e041526. doi: 10.1136/bmjopen-2020-041526 (PMC7996367; doi:10.1136/bmjopen-2020-041526), 2021-03-25
Supplement: bmjopen-2020-041526.reviewer_comments.pdf [file bmjopen-2020-041526.reviewer_comments.pdf]

## PEER REVIEW HISTORY

BMJ Open publishes all reviews undertaken for accepted manuscripts. Reviewers are asked to complete a checklist review form (<http://bmjopen.bmj.com/site/about/resources/checklist.pdf>) and are provided with free text boxes to elaborate on their assessment. These free text comments are reproduced below.

### ARTICLE DETAILS

|                            |                                                                                                    |
|----------------------------|----------------------------------------------------------------------------------------------------|
| <b>TITLE (PROVISIONAL)</b> | Epidemiology and risk factors for diabetes in the suburbs of Beijing: a retrospective cohort study |
| <b>AUTHORS</b>             | Xie, Lingding; Zhao, Xu; Zhang, Bo; Zhu, Haiqing                                                   |

### VERSION 1 – REVIEW

|                        |                              |
|------------------------|------------------------------|
| <b>REVIEWER</b>        | Pouya Saeedi<br>IDF, Belgium |
| <b>REVIEW RETURNED</b> | 07-Jul-2020                  |

|                         |                                                                                                                                                                                                                                                                                                                                                                                                                                                                                                                                                                                                                                                                                                                                                                                                                                                                                                                                                                                                                                                                                                                                                                                                                                                                                                                                                                                                                                                                                                                                                                                                                                                                                                                                                                                                                                                                                                                                 |
|-------------------------|---------------------------------------------------------------------------------------------------------------------------------------------------------------------------------------------------------------------------------------------------------------------------------------------------------------------------------------------------------------------------------------------------------------------------------------------------------------------------------------------------------------------------------------------------------------------------------------------------------------------------------------------------------------------------------------------------------------------------------------------------------------------------------------------------------------------------------------------------------------------------------------------------------------------------------------------------------------------------------------------------------------------------------------------------------------------------------------------------------------------------------------------------------------------------------------------------------------------------------------------------------------------------------------------------------------------------------------------------------------------------------------------------------------------------------------------------------------------------------------------------------------------------------------------------------------------------------------------------------------------------------------------------------------------------------------------------------------------------------------------------------------------------------------------------------------------------------------------------------------------------------------------------------------------------------|
| <b>GENERAL COMMENTS</b> | <p>Thank you for sharing your research. Some aspects of the research mainly in the methods and result section require more detailed information.</p> <p><b>Abstract:</b><br/>abbreviations need to be spelled out when introducing for the 1st time.<br/>Few grammar points need attention.</p> <p><b>Introduction:</b><br/>where reporting prevalence of T2D, more recent global data are available:<br/><a href="https://www.sciencedirect.com/science/article/pii/S0168822719312306">https://www.sciencedirect.com/science/article/pii/S0168822719312306</a><br/>Same applies to health expenditure data:<br/><a href="https://www.sciencedirect.com/science/article/pii/S0168822720301388">https://www.sciencedirect.com/science/article/pii/S0168822720301388</a></p> <p><b>Methods:</b><br/>Please mention the sample in the objective: The objective of this study is to determine the incidence of and risk factors for T2DM in the suburbs of Beijing.<br/>Line 112-114, please revise to make it clear how none diabetic people have been tested and assigned to the 2 groups.<br/>Line 143-144, Not sure what does the half-hour mean in this context, please revise: the day before the examination and to sit quietly in a chair for at least 5 min in the<br/>half-hour before the measurement with their arms bare and placed at the chest level.<br/>Line 148, please specify who has done through the OGGT test.</p> <p><b>Results:</b><br/>line 165-166, where it is mentioned "After eliminating 118 subjects who were diagnosed with diabetes at baseline", were they excluded based on self-reported or blood test? Please clarify and also adjust the method accordingly to clearly explain who and how was excluded in the initial assessment.<br/>It is suggested to use the term "sex" instead of "gender".<br/>Line 175-176, were the results clinically significant? Please add the information.</p> |
|-------------------------|---------------------------------------------------------------------------------------------------------------------------------------------------------------------------------------------------------------------------------------------------------------------------------------------------------------------------------------------------------------------------------------------------------------------------------------------------------------------------------------------------------------------------------------------------------------------------------------------------------------------------------------------------------------------------------------------------------------------------------------------------------------------------------------------------------------------------------------------------------------------------------------------------------------------------------------------------------------------------------------------------------------------------------------------------------------------------------------------------------------------------------------------------------------------------------------------------------------------------------------------------------------------------------------------------------------------------------------------------------------------------------------------------------------------------------------------------------------------------------------------------------------------------------------------------------------------------------------------------------------------------------------------------------------------------------------------------------------------------------------------------------------------------------------------------------------------------------------------------------------------------------------------------------------------------------|

|                         |                                                                                                                                                                                                                                                                                                                                                                                                                                                                                                          |
|-------------------------|----------------------------------------------------------------------------------------------------------------------------------------------------------------------------------------------------------------------------------------------------------------------------------------------------------------------------------------------------------------------------------------------------------------------------------------------------------------------------------------------------------|
|                         | In the result section there is a need to mention whether the reported numbers are also meaningful from clinical point of view or not.                                                                                                                                                                                                                                                                                                                                                                    |
| <b>REVIEWER</b>         | Dongsheng Hu<br>China                                                                                                                                                                                                                                                                                                                                                                                                                                                                                    |
| <b>REVIEW RETURNED</b>  | 09-Sep-2020                                                                                                                                                                                                                                                                                                                                                                                                                                                                                              |
| <b>GENERAL COMMENTS</b> | There are some concerns about this manuscript:<br>1. The author mentioned that the study population was selected by random sampling method, but the details were not described, the representativeness of the sample is questionable.<br>2. The anthropometrics should be measured by trained people or the data may not trustful, especially the blood pressure tested by a mercury sphygmomanometer.<br>3. The distribution of data should be taken into consideration with the application of t test. |

### VERSION 1 – AUTHOR RESPONSE

Reviewer 1

Comment 1: Please state any competing interests or state 'None declared':  
None declared

Response: Thank you for your comment. According to your comment, we have added the sentence in line 276(clean version).

Comment 2: Abstract: abbreviations need to be spelled out when introducing for the 1st time.

Response: Thank you for your careful work. We have made the corrections in the revised abstract.

Comment 3: Few grammar points need attention.

Response: Thank you for your careful work. We have tried our best to correct the grammatical errors.

Comment 4: Introduction: where reporting prevalence of T2D, more recent global data are available: <https://www.sciencedirect.com/science/article/pii/S0168822719312306>

Same applies to health expenditure data: <https://www.sciencedirect.com/science/article/pii/S0168822720301388>

Response: Thank you for your instructive suggestion. According to the literature you recommended, we have updated the data concerning the prevalence of T2DM and health expenditure.

Comment 5: Please mention the sample in the objective: The objective of this study is to determine the incidence of and risk factors for T2DM in the suburbs of Beijing.

Response: Thank you for your comment. We have added the sample in the objective in line 98.

Comment 6: Line 112-114, please revise to make it clear how none diabetic people have been tested and assigned to the 2 groups.

Response: Thank you for your valuable advice. First, people with a history of diabetes were excluded from the study. Second, all the subjects were asked to undergo an oral glucose tolerance test (OGTT); subjects with diabetes at baseline were excluded.

Comment 7: Line 143-144, Not sure what does the half-hour mean in this context, please revise: the day before the examination and to sit quietly in a chair for at least 5 min in the half-hour before the measurement with their arms bare and placed at the chest level. Line 148, please specify who has done through the OGGT test.

Response: We apologize for our inappropriate description and have deleted the phrase "in the half-hour".

Comment 8: Results: line 165-166, where it is mentioned "After eliminating 118 subjects who were diagnosed with diabetes at baseline", were they excluded based on self-reported or blood test? Please clarify and also adjust the method accordingly to clearly explain who and how was excluded in the initial assessment.

Response: Thank you for your careful work. According to your comments, we have revised the methods section to explain the exclusion criteria clearly.

Comment 9: It is suggested to use the term "sex" instead of "gender".

Response: Thank you for your careful reading. We have made the correction in the revised manuscript.

Comment 10: Line 175-176, were the results clinically significant? Please add the information. In the result section there is a need to mention whether the reported numbers are also meaningful from clinical point of view or not.

Response: Thank you for your instructive suggestion. The results were clinically significant. We have rewritten the sentence.

## Reviewer 2

Comment 1: The author mentioned that the study population was selected by random sampling method, but the details were not described, the representativeness of the sample is questionable.

Response: Thank you for your comment. The three suburbs were randomly selected from the Beijing countryside. The study population was selected using a random sampling method. However, the follow-up could not be random due to the limitations of the conditions.

Comment 2: The anthropometrics should be measured by trained people or the data may not trustful, especially the blood pressure tested by a mercury sphygmomanometer.

Response: In our study, all clinical staff members were trained to measure blood pressure and obtain anthropometric measurements. According to your helpful advice, we have added this information in lines 143–145.

Comment 3: The distribution of data should be taken into consideration with the application of t test.

Response: Thank you for your helpful advice. We used the P-P plot to test the normality of the numerical variables. A t-test was performed for the data that conform to the normal distribution.

Comment 4: Authors must include a statement in the methods section of the manuscript under the sub-heading 'Patient and Public Involvement'.

Response: Thank you for your careful work. We have added the sub-heading 'Patient and Public Involvement' in lines 165–167.
